# Supplementary material for: Better prognostic determination and feature characterization of cutaneous melanoma through integrative genomic analysis
Source: Aging (Albany NY). 2019 Jul 18;11(14):5081–107. doi: 10.18632/aging.102099 (PMC6746212; doi:10.18632/aging.102099)
Supplement: Supplementary Table 1 [file aging-11-102099-s002.xls]

## Sheet: 447PatientInfo
Supplementary Table S1. Clinical information on the patients in this study.
Patient_ID	Gender	Age	Height	Weight	Race	Pathological_Stage	T_Stage	N_Stage	M_Stage	Tumor_Tissue_Site
TCGA-3N-A9WC	MALE	82	183	68	WHITE	Stage IIA	T2b	NX	M0	Trunk
TCGA-3N-A9WD	MALE	82	183	116	WHITE	Stage IIIA	T2a	N1a	M0	Other Specify
TCGA-BF-A1PU	FEMALE	46	160	58	WHITE	Stage IIC	T4b	N0	M0	Extremities
TCGA-BF-A1PV	FEMALE	74	160	70	WHITE	Stage IIC	T4b	N0	M0	Trunk
TCGA-BF-A1PX	MALE	56	175	78	WHITE	Stage IIIB	T4b	N2a	M0	Trunk
TCGA-BF-A1PZ	FEMALE	71	163	56	WHITE	Stage IIB	T4a	N0	M0	Extremities
TCGA-BF-A1Q0	MALE	80	173	69	WHITE	Stage IIC	T4b	N0	M0	Trunk
TCGA-BF-A3DJ	FEMALE	36	165	70	WHITE	Stage IIIB	T4b	N1	M0	Extremities
TCGA-BF-A3DL	FEMALE	84	158	62	WHITE	Stage IIIB	T3b	N2	M0	Extremities
TCGA-BF-A3DM	MALE	63	172	97	WHITE	Stage IIA	T2b	N0	M0	Trunk
TCGA-BF-A3DN	FEMALE	81	157	58	WHITE	Stage IIIC	T3b	N3	M0	Extremities
TCGA-BF-A5EP	FEMALE	75	165	83	WHITE	Stage IIIC	T4b	N3	M0	Trunk
TCGA-BF-A5EQ	MALE	63	178	90	WHITE	Stage IIC	T4b	N0	M0	Trunk
TCGA-BF-A5ER	MALE	63	180	93	WHITE	Stage IIC	T4b	N0	M0	Trunk
TCGA-BF-A5ES	FEMALE	76	160	56	WHITE	Stage IIC	T4b	N0	M0	Trunk
TCGA-BF-A9VF	MALE	77	174	77	WHITE	Stage IIC	T4b	N0	M0	Extremities
TCGA-BF-AAOU	FEMALE	73	160	50	WHITE	Stage IIC	T4b	N0	M0	Trunk
TCGA-BF-AAOX	MALE	83	175	80	WHITE	Stage IIC	T4b	N0	M0	Extremities
TCGA-BF-AAP0	FEMALE	40	170	57	WHITE	Stage IV	T4	NX	M1	Trunk
TCGA-BF-AAP1	MALE	86	167	68	WHITE	Stage IIC	T4b	N0	M0	Extremities
TCGA-BF-AAP2	MALE	62	173	75	WHITE	Stage IIB	T3b	N0	M0	Extremities
TCGA-BF-AAP4	MALE	61	176	86	WHITE	Stage IIC	T4b	N0	M0	Trunk
TCGA-BF-AAP6	MALE	55	170	75	WHITE	Stage III	T4b	N2	M0	Extremities
TCGA-BF-AAP7	FEMALE	76	158	67	WHITE	Stage IIC	T4b	N0	M0	Extremities
TCGA-BF-AAP8	MALE	58	159	65	WHITE	Stage IIC	T4b	N0	M0	Extremities
TCGA-D3-A1Q1	FEMALE	79	162	59	WHITE	Stage IIIC	T1b	N3	M0	Extremities
TCGA-D3-A1Q3	MALE	64	182	108	WHITE	Stage IIC	T4b	N0	M0	Extremities
TCGA-D3-A1Q4	FEMALE	53	155	83	WHITE	Stage IIIC	T2b	N1b	M0	Extremities
TCGA-D3-A1Q5	MALE	60	179	125	WHITE	I/II NOS	TX	N0	M0	Trunk
TCGA-D3-A1Q6	MALE	55	175	81	WHITE	Stage III	T4	N1b	M0	Extremities
TCGA-D3-A1Q7	FEMALE	42	170	79	WHITE	Stage IB	T1b	N0	M0	Trunk
TCGA-D3-A1Q8	MALE	33	187	161	WHITE	Stage IV	T0	N3	M1b	Unknown
TCGA-D3-A1Q9	MALE	72	177	98	WHITE	Stage IIIB	T4b	N2a	M0	Extremities
TCGA-D3-A1QA	MALE	55	175	90	WHITE	Stage IB	T2a	N0	M0	Extremities
TCGA-D3-A1QB	FEMALE	75	147	86	WHITE	Stage III	T0	N2c	M0	Unknown
TCGA-D3-A2J6	MALE	65	185	141	WHITE	Stage IIB	T3b	N0	M0	Extremities
TCGA-D3-A2J7	MALE	67	175	93	WHITE	Stage IIIC	T3b	N1b	M0	Trunk
TCGA-D3-A2J8	MALE	48	183	79	WHITE	Stage IB	T2a	N0	M0	Extremities
TCGA-D3-A2J9	MALE	75	183	70	WHITE	Stage IIIC	T4b	N3	M0	Trunk|Extremities
TCGA-D3-A2JA	MALE	68	175	113	WHITE	Stage IIIA	T2a	N1a	M0	Trunk
TCGA-D3-A2JB	FEMALE	70	163	57	BLACK OR AFRICAN AMERICAN	Stage 0	Tis	N0	M0	Extremities
TCGA-D3-A2JC	FEMALE	53	168	83	WHITE	Stage III	T0	N2b	M0	Unknown
TCGA-D3-A2JD	MALE	58	183	73	WHITE	Stage IIIC	T4b	N1b	M0	Extremities
TCGA-D3-A2JE	FEMALE	75	160	81	WHITE	Stage IIIC	TX	N3	M0	Trunk
TCGA-D3-A2JF	MALE	74	170	80	WHITE	Stage IA	T1a	N0	M0	Extremities|Trunk
TCGA-D3-A2JG	FEMALE	30	165	89	WHITE	Stage IIIA	T3a	N1a	M0	Extremities
TCGA-D3-A2JH	MALE	68	175	123	WHITE	Stage IB	T1b	N0	M0	Extremities
TCGA-D3-A2JK	MALE	24	185	92	WHITE	Stage IIIC	T4b	N2b	M0	Trunk
TCGA-D3-A2JL	FEMALE	43	165	72	WHITE	I/II NOS	TX	N0	M0	Extremities
TCGA-D3-A2JN	FEMALE	46	163	76	WHITE	Stage III	T0	N1b	M0	Unknown
TCGA-D3-A2JO	FEMALE	50	174	77	WHITE	Stage IIIC	TX	N3	M0	Extremities
TCGA-D3-A2JP	MALE	37	175	75	WHITE	Stage IIIC	T0	N3	M0	Unknown
TCGA-D3-A3BZ	MALE	63	170	99	WHITE	Stage IIB	T4a	N0	M0	Head and Neck
TCGA-D3-A3C1	MALE	Unknown	179	83	WHITE	I/II NOS	TX	N0	M0	Trunk
TCGA-D3-A3C3	FEMALE	Unknown	170	80	WHITE	I/II NOS	TX	N0	M0	Trunk
TCGA-D3-A3C6	FEMALE	54	165	85	WHITE	Stage IB	T2a	N0	M0	Extremities
TCGA-D3-A3C7	FEMALE	57	162	72	WHITE	Stage III	T0	N1b	M0	Unknown
TCGA-D3-A3C8	FEMALE	58	164	132	WHITE	Stage IIIC	TX	N3	M0	Head and Neck
TCGA-D3-A3CB	MALE	39	173	86	WHITE	I/II NOS	T2	N0	M0	Trunk
TCGA-D3-A3CC	FEMALE	69	164	87	WHITE	Stage IIC	T4b	N0	M0	Other Specify
TCGA-D3-A3CE	FEMALE	74	165	75	WHITE	Stage III	T0	N1b	M0	Unknown
TCGA-D3-A3CF	FEMALE	61	162	129	WHITE	Stage IIIC	T4b	N3	M0	Other Specify
TCGA-D3-A3ML	MALE	70	178	76	WHITE	Stage IIIA	T3a	N2a	M0	Head and Neck
TCGA-D3-A3MO	MALE	47	178	70	WHITE	Stage III	TX	N2c	M0	Trunk
TCGA-D3-A3MR	MALE	42	180	86	WHITE	Stage III	T0	N1b	M0	Unknown
TCGA-D3-A3MU	MALE	53	181	110	WHITE	Stage IIIA	T3a	N2a	M0	Trunk
TCGA-D3-A3MV	FEMALE	38	156	135	WHITE	Stage IIIB	T2b	N2a	M0	Extremities
TCGA-D3-A51E	FEMALE	39	163	61	WHITE	I/II NOS	T2	N0	M0	Extremities
TCGA-D3-A51F	MALE	51	187	90	WHITE	Stage IIIC	T4b	N1b	M0	Extremities
TCGA-D3-A51G	MALE	Unknown	190	112	WHITE	Stage 0	Tis	N0	M0	Trunk
TCGA-D3-A51H	MALE	60	183	78	WHITE	Stage IIIC	T1b	N3	M0	Trunk
TCGA-D3-A51J	MALE	19	185	126	WHITE	Stage III	T0	N1b	M0	Unknown
TCGA-D3-A51K	MALE	51	173	90	WHITE	Stage IIIB	Tis	N2b	M0	Extremities
TCGA-D3-A51N	FEMALE	56	163	84	WHITE	Stage IV	T0	N3	M1c	Unknown
TCGA-D3-A51R	MALE	60	181	72	WHITE	Stage IIA	T3a	N0	M0	Extremities
TCGA-D3-A51T	FEMALE	59	152	92	WHITE	Stage IIIC	T4b	N1b	M0	Trunk
TCGA-D3-A5GL	MALE	74	185	113	WHITE	Stage IB	T2a	N0	M0	Extremities
TCGA-D3-A5GN	FEMALE	15	167	68	WHITE	Stage I	T1	N0	M0	Trunk
TCGA-D3-A5GS	MALE	58	172	99	WHITE	Stage IV	T1b	N1b	M1c	Trunk
TCGA-D3-A5GT	MALE	43	155	79	WHITE	Stage IIIC	T2b	N3	M0	Trunk
TCGA-D3-A5GU	MALE	36	177	75	WHITE	Stage IB	T1b	N0	M0	Extremities
TCGA-D3-A8GB	MALE	48	183	89	WHITE	Stage IIIB	T3a	N1b	M0	Extremities
TCGA-D3-A8GC	MALE	48	180	114	WHITE	Stage IIIC	TX	N3	M0	Unknown
TCGA-D3-A8GD	FEMALE	63	168	79	WHITE	Stage IIIC	T4b	N3	M0	Extremities
TCGA-D3-A8GE	MALE	26	176	97	WHITE	Stage IV	TX	N0	M1b	Unknown
TCGA-D3-A8GJ	MALE	18	192	85	WHITE	Stage II	T3	N0	M0	Head and Neck
TCGA-D3-A8GL	MALE	43	183	107	WHITE	Stage IIIB	T2a	N1b	M0	Extremities
TCGA-D3-A8GM	MALE	73	168	75	WHITE	Stage IIB	T3b	N0	M0	Trunk
TCGA-D3-A8GN	FEMALE	27	165	64	WHITE	I/II NOS	TX	N0	M0	Unknown
TCGA-D3-A8GO	FEMALE	Unknown	167	69	WHITE	I/II NOS	T2	N0	M0	Extremities
TCGA-D3-A8GP	MALE	77	175	72	WHITE	Stage III	T2	N2c	M0	Extremities
TCGA-D3-A8GQ	MALE	66	174	82	WHITE	Stage II	T3	N0	M0	Trunk
TCGA-D3-A8GR	FEMALE	54	168	84	WHITE	Stage 0	Tis	N0	M0	Extremities
TCGA-D3-A8GS	MALE	52	181	111	WHITE	Stage I	T1	N0	M0	Trunk
TCGA-D3-A8GV	MALE	25	182	102	WHITE	I/II NOS	TX	N0	M0	Extremities
TCGA-D9-A148	MALE	40	179	84	WHITE	Unknown	TX	N3	M1b	Trunk
TCGA-D9-A149	FEMALE	65	164	87	WHITE	Unknown	TX	N1b	M0	Trunk
TCGA-D9-A1JW	MALE	82	160	86	WHITE	Unknown	T1a	N2a	M0	Head and Neck
TCGA-D9-A1JX	FEMALE	80	160	86	WHITE	Unknown	TX	NX	M0	Extremities
TCGA-D9-A1X3	MALE	63	170	95	WHITE	Unknown	T4b	N2b	Unknown	Extremities
TCGA-D9-A3Z1	MALE	66	180	80	WHITE	Stage IIIC	T2a	N3	M0	Unknown
TCGA-D9-A3Z3	FEMALE	39	164	61	WHITE	Stage IIIB	T3a	N1b	M0	Unknown
TCGA-D9-A3Z4	MALE	54	175	90	WHITE	Stage IIIC	T4b	N3	M0	Unknown
TCGA-D9-A4Z2	MALE	50	164	54	WHITE	Stage IIIC	T4b	N3	M0	Trunk|Extremities
TCGA-D9-A4Z3	FEMALE	73	170	70	WHITE	Stage IIIC	T4b	N1b	M0	Extremities
TCGA-D9-A4Z5	MALE	68	176	112	WHITE	Stage IIB	T4a	N0	M0	Head and Neck
TCGA-D9-A4Z6	MALE	54	178	88	WHITE	Stage IIIC	T3b	N1b	M0	Trunk
TCGA-D9-A6E9	FEMALE	75	165	89	WHITE	Stage IIIA	T3a	N1	M0	Extremities
TCGA-D9-A6EA	MALE	70	166	58	WHITE	Stage IIIC	T4a	N3	M0	Trunk
TCGA-D9-A6EC	MALE	56	175	130	WHITE	Stage IIIA	T3a	N1	M0	Trunk
TCGA-DA-A1HV	FEMALE	75	Unknown	Unknown	WHITE	Stage IIIB	T0	N2b	M0	Unknown
TCGA-DA-A1HW	FEMALE	37	Unknown	69	WHITE	Stage IIIB	T1a	N1b	M0	Trunk
TCGA-DA-A1HY	MALE	42	178	80	WHITE	Stage III	T2b	N1	M0	Extremities
TCGA-DA-A1I0	MALE	63	Unknown	Unknown	WHITE	Stage IV	T4b	N3	M1a	Trunk
TCGA-DA-A1I1	MALE	55	Unknown	Unknown	WHITE	Stage III	T0	N2a	M0	Unknown
TCGA-DA-A1I2	MALE	45	Unknown	92	WHITE	Stage III	T4b	N2b	M0	Trunk
TCGA-DA-A1I4	MALE	51	170	72	WHITE	Stage IIIC	T3b	N2b	M0	Trunk
TCGA-DA-A1I5	FEMALE	27	Unknown	Unknown	WHITE	Stage IV	T1a	N0	M1c	Head and Neck
TCGA-DA-A1I7	MALE	62	193	87	WHITE	Stage IIIB	T0	N2b	M0	Unknown
TCGA-DA-A1I8	FEMALE	63	168	71	WHITE	Stage IIC	T4b	N0	M0	Extremities
TCGA-DA-A1IA	FEMALE	32	Unknown	Unknown	WHITE	Stage IIIB	T2a	N1b	M0	Extremities
TCGA-DA-A1IB	FEMALE	69	Unknown	Unknown	WHITE	Stage IIIC	T2b	N2b	M0	Extremities
TCGA-DA-A1IC	MALE	81	175	81	WHITE	Stage IIIB	T3a	N2c	M0	Extremities
TCGA-DA-A3F2	MALE	55	Unknown	87	WHITE	Stage IIIB	T4a	N2b	M0	Trunk
TCGA-DA-A3F3	MALE	52	Unknown	Unknown	WHITE	Stage IIIB	T0	N2b	M0	Unknown
TCGA-DA-A3F5	MALE	45	Unknown	Unknown	WHITE	Stage I	T1a	N0	M0	Trunk
TCGA-DA-A3F8	MALE	39	Unknown	Unknown	WHITE	Stage IIIB	T2a	N2b	M0	Head and Neck
TCGA-DA-A95V	FEMALE	83	Unknown	Unknown	WHITE	Stage IIC	T4b	N0	Unknown	Head and Neck
TCGA-DA-A95W	MALE	52	Unknown	Unknown	WHITE	Stage IIIB	TX	N1b	M0	Unknown
TCGA-DA-A95X	MALE	62	Unknown	Unknown	WHITE	Stage IB	T2a	N0	M0	Extremities
TCGA-DA-A95Y	MALE	68	Unknown	Unknown	WHITE	Stage IIC	T4b	N0	M0	Trunk
TCGA-DA-A95Z	MALE	87	Unknown	Unknown	WHITE	Stage IV	TX	N0	M1a	Unknown
TCGA-DA-A960	MALE	73	Unknown	Unknown	WHITE	Stage IIB	T3b	N0	M0	Trunk
TCGA-EB-A1NK	MALE	48	184	132	WHITE	Stage IIC	T4b	N0	M0	Extremities
TCGA-EB-A24C	MALE	56	180	74	WHITE	Unknown	T4b	NX	M0	Trunk
TCGA-EB-A24D	MALE	72	175	86	WHITE	Stage IIIB	T4a	N2b	M0	Extremities
TCGA-EB-A299	MALE	63	170	90	WHITE	Stage IIA	T2b	N0	M0	Extremities
TCGA-EB-A3HV	MALE	37	180	69	WHITE	Stage IIC	T4b	N0	M0	Trunk
TCGA-EB-A3XB	MALE	63	164	80	WHITE	Stage II	T4	NX	M0	Trunk
TCGA-EB-A3XC	MALE	74	178	70	WHITE	Stage IIC	T4b	N0	M0	Trunk
TCGA-EB-A3XD	FEMALE	53	164	80	WHITE	Stage IIC	T4b	NX	M0	Extremities
TCGA-EB-A3XE	FEMALE	77	158	62	WHITE	Stage IIA	T3a	N0	M0	Trunk
TCGA-EB-A3XF	MALE	57	182	88	WHITE	Stage IIC	T4b	N0	M0	Trunk
TCGA-EB-A3Y6	FEMALE	56	168	65	WHITE	Stage IIC	T4b	N0	M0	Extremities
TCGA-EB-A3Y7	FEMALE	86	146	55	WHITE	Stage IIIB	T3a	N2c	M0	Head and Neck
TCGA-EB-A41A	MALE	90	162	63	WHITE	Stage IIC	T4b	N0	M0	Head and Neck
TCGA-EB-A41B	FEMALE	76	150	53	WHITE	Stage IIC	T4b	N0	M0	Extremities
TCGA-EB-A42Y	FEMALE	73	152	43	ASIAN	Stage IIC	T4b	N0	M0	Extremities
TCGA-EB-A42Z	MALE	49	165	50	ASIAN	Stage IIIC	T4b	N1b	M0	Extremities
TCGA-EB-A430	MALE	83	168	85	WHITE	Stage IIC	T4b	N0	M0	Trunk
TCGA-EB-A431	MALE	34	170	62	WHITE	Stage IIC	T4b	N0	M0	Extremities
TCGA-EB-A44N	MALE	59	183	70	WHITE	Stage IIC	T4b	N0	M0	Extremities
TCGA-EB-A44O	MALE	69	182	89	WHITE	Stage IIB	T4a	N0	M0	Trunk
TCGA-EB-A44P	FEMALE	58	164	68	WHITE	Stage IIC	T4b	N0	M0	Trunk
TCGA-EB-A44Q	FEMALE	51	154	47	ASIAN	Stage IIIC	TX	N3	M0	Extremities
TCGA-EB-A44R	MALE	52	164	53	ASIAN	Stage IIIB	TX	N2b	M0	Extremities
TCGA-EB-A4IQ	FEMALE	42	150	40	ASIAN	Stage IIIB	T4b	N1	M0	Trunk
TCGA-EB-A4IS	MALE	77	155	80	WHITE	Stage IIB	T3b	NX	M0	Trunk
TCGA-EB-A4OY	FEMALE	65	172	87	WHITE	Stage IIIB	T4b	N1a	M0	Extremities
TCGA-EB-A4OZ	FEMALE	41	170	80	WHITE	Stage IIIC	T4a	N3	M0	Trunk
TCGA-EB-A4P0	MALE	82	178	76	WHITE	Stage IIC	T4b	N0	M0	Trunk
TCGA-EB-A4XL	FEMALE	56	168	52	WHITE	Stage IIC	T4b	NX	M0	Extremities
TCGA-EB-A51B	MALE	53	173	94	WHITE	Stage IIC	T4b	NX	M0	Trunk
TCGA-EB-A550	FEMALE	75	158	70	WHITE	Stage IIC	T4b	NX	M0	Unknown
TCGA-EB-A551	FEMALE	78	172	65	WHITE	Stage IIIC	T4b	N2b	M0	Extremities
TCGA-EB-A57M	MALE	56	168	61	ASIAN	Stage IIIB	T4b	N1	M0	Extremities
TCGA-EB-A5FP	FEMALE	65	180	82	WHITE	Stage IV	T4b	NX	M1b	Trunk
TCGA-EB-A5KH	MALE	55	172	62	ASIAN	Stage III	T0	N1	M0	Extremities
TCGA-EB-A5SG	FEMALE	57	162	61	WHITE	Unknown	Unknown	Unknown	Unknown	Extremities
TCGA-EB-A5SH	FEMALE	60	168	56	WHITE	Stage III	T4	N0	M0	Extremities
TCGA-EB-A5UL	MALE	71	183	80	WHITE	Stage III	TX	N1	M0	Trunk
TCGA-EB-A5UM	FEMALE	48	162	60	WHITE	Stage IIC	T4b	N0	M0	Trunk
TCGA-EB-A5UN	MALE	49	180	62	WHITE	Stage IIC	T4b	NX	M0	Trunk
TCGA-EB-A5VU	MALE	56	160	60	ASIAN	Stage IIIB	T4b	N1	M0	Extremities
TCGA-EB-A5VV	FEMALE	74	160	96	WHITE	Stage IIIB	T3b	N1	M0	Head and Neck
TCGA-EB-A6L9	MALE	55	156	58	ASIAN	Stage IIIC	TX	N3	M0	Extremities
TCGA-EB-A6QY	MALE	71	169	97	WHITE	Stage IIC	T4b	N0	M0	Trunk
TCGA-EB-A6QZ	FEMALE	76	162	60	WHITE	Stage IIA	T3a	N0	M0	Trunk
TCGA-EB-A6R0	FEMALE	58	160	115	WHITE	Stage IIC	T4b	N0	M0	Trunk
TCGA-EB-A82B	FEMALE	58	160	55	ASIAN	Stage III	T4b	N2	M0	Extremities
TCGA-EB-A82C	FEMALE	70	150	42	ASIAN	Stage IIC	T4b	N0	M0	Extremities
TCGA-EB-A85I	MALE	66	170	82	WHITE	Stage IIC	T4b	N0	M0	Trunk
TCGA-EB-A85J	FEMALE	66	166	128	WHITE	Stage IIB	T4a	N0	M0	Trunk
TCGA-EB-A97M	MALE	66	171	68	WHITE	Stage IIC	T4b	N0	M0	Trunk
TCGA-EE-A17X	MALE	54	Unknown	Unknown	WHITE	Stage IA	T1a	N0	M0	Trunk
TCGA-EE-A17Y	MALE	69	Unknown	Unknown	ASIAN	Stage IIIB	T3b	N1a	M0	Trunk
TCGA-EE-A17Z	MALE	57	Unknown	Unknown	WHITE	Stage IIB	T4a	N0	M0	Trunk
TCGA-EE-A180	MALE	69	Unknown	Unknown	WHITE	Stage III	T4a	N0	M0	Trunk
TCGA-EE-A181	FEMALE	82	Unknown	Unknown	WHITE	Stage II	T3	N0	M0	Extremities
TCGA-EE-A182	FEMALE	84	Unknown	Unknown	WHITE	Stage IIIC	T4b	N1b	M0	Trunk
TCGA-EE-A183	MALE	48	Unknown	Unknown	WHITE	Stage 0	Tis	N0	M0	Trunk
TCGA-EE-A184	MALE	72	Unknown	Unknown	WHITE	Stage IB	T2a	N0	M0	Extremities
TCGA-EE-A185	FEMALE	55	Unknown	Unknown	WHITE	Stage IIIC	T4b	N3	M0	Extremities
TCGA-EE-A20B	FEMALE	66	Unknown	Unknown	WHITE	Stage II	T3	N0	M0	Extremities
TCGA-EE-A20C	MALE	59	Unknown	Unknown	WHITE	Stage 0	Tis	N0	M0	Extremities
TCGA-EE-A20F	MALE	53	Unknown	Unknown	WHITE	Stage I	T1	N0	M0	Extremities
TCGA-EE-A20H	MALE	56	Unknown	Unknown	WHITE	Stage I	T2	N0	M0	Extremities
TCGA-EE-A20I	MALE	79	Unknown	Unknown	WHITE	Stage IV	TX	N0	M1c	Extremities
TCGA-EE-A29A	MALE	68	Unknown	Unknown	WHITE	Stage IIIA	T3a	N1a	M0	Trunk
TCGA-EE-A29B	MALE	67	Unknown	Unknown	WHITE	Stage IIB	T3b	N0	M0	Extremities
TCGA-EE-A29C	MALE	20	Unknown	Unknown	WHITE	Stage IB	T2a	N0	M0	Trunk
TCGA-EE-A29D	MALE	87	Unknown	Unknown	WHITE	Stage IIIC	T3b	N1b	M0	Head and Neck
TCGA-EE-A29E	MALE	54	Unknown	Unknown	WHITE	Stage IIIB	T3a	N1b	M0	Extremities
TCGA-EE-A29G	MALE	53	Unknown	Unknown	WHITE	Stage IIIA	T4a	N2a	M0	Head and Neck
TCGA-EE-A29H	FEMALE	59	Unknown	Unknown	WHITE	Stage IA	T1a	N0	M0	Trunk
TCGA-EE-A29L	MALE	78	Unknown	Unknown	WHITE	Stage IIIC	T4b	N3	M0	Extremities
TCGA-EE-A29M	FEMALE	33	Unknown	Unknown	WHITE	Stage IB	T2a	N0	M0	Extremities
TCGA-EE-A29N	MALE	78	Unknown	Unknown	WHITE	I/II NOS	TX	N0	M0	Trunk
TCGA-EE-A29P	FEMALE	73	Unknown	Unknown	WHITE	Stage IIC	T4b	N0	M0	Trunk
TCGA-EE-A29Q	FEMALE	70	Unknown	Unknown	WHITE	Stage IIB	T3b	N0	M0	Extremities
TCGA-EE-A29R	FEMALE	48	Unknown	Unknown	WHITE	Stage IIIC	T3b	N1b	M0	Head and Neck
TCGA-EE-A29S	MALE	79	Unknown	Unknown	WHITE	Stage IIA	T3a	N0	M0	Extremities
TCGA-EE-A29T	FEMALE	51	Unknown	Unknown	WHITE	Unknown	TX	NX	M0	Trunk
TCGA-EE-A29V	MALE	85	Unknown	Unknown	WHITE	Stage IIIC	T3b	N1b	M0	Head and Neck
TCGA-EE-A29W	MALE	42	Unknown	Unknown	WHITE	Stage 0	Tis	N0	M0	Extremities
TCGA-EE-A29X	FEMALE	58	Unknown	Unknown	WHITE	Stage IB	T2a	N0	M0	Head and Neck
TCGA-EE-A2A0	FEMALE	77	Unknown	Unknown	WHITE	Stage IIA	T3a	N0	M0	Extremities
TCGA-EE-A2A1	MALE	46	Unknown	Unknown	WHITE	Stage IB	T2a	N0	M0	Extremities
TCGA-EE-A2A2	MALE	71	Unknown	Unknown	WHITE	Stage IIIC	T4b	N1b	M0	Trunk
TCGA-EE-A2A5	MALE	43	Unknown	Unknown	WHITE	Stage IB	T2a	N0	M0	Extremities
TCGA-EE-A2A6	MALE	43	Unknown	Unknown	WHITE	Stage IA	T1a	N0	M0	Trunk
TCGA-EE-A2GB	MALE	51	Unknown	Unknown	WHITE	Stage IIIB	T2b	N1a	M0	Trunk
TCGA-EE-A2GC	MALE	82	Unknown	Unknown	WHITE	Stage IIB	T3b	N0	M0	Head and Neck
TCGA-EE-A2GD	FEMALE	58	Unknown	Unknown	WHITE	Stage IIB	T4	N0	M0	Extremities
TCGA-EE-A2GE	MALE	44	Unknown	Unknown	WHITE	Stage I	T2	N0	M0	Trunk
TCGA-EE-A2GH	MALE	34	Unknown	Unknown	WHITE	Stage I	T2	N0	M0	Trunk
TCGA-EE-A2GI	MALE	39	Unknown	Unknown	WHITE	Stage IA	T1a	N0	M0	Extremities
TCGA-EE-A2GJ	MALE	83	Unknown	Unknown	WHITE	Stage IA	T1a	N0	M0	Extremities
TCGA-EE-A2GK	FEMALE	46	Unknown	Unknown	WHITE	Stage I	T1	N0	M0	Trunk
TCGA-EE-A2GL	FEMALE	40	Unknown	Unknown	WHITE	Stage IIA	T3a	N0	M0	Extremities
TCGA-EE-A2GM	FEMALE	70	Unknown	Unknown	WHITE	Stage IIC	T4b	N0	M0	Trunk
TCGA-EE-A2GN	MALE	67	Unknown	Unknown	WHITE	Stage IIA	T2b	N0	M0	Trunk
TCGA-EE-A2GO	FEMALE	66	Unknown	Unknown	WHITE	Stage II	T3b	N0	M0	Extremities
TCGA-EE-A2GP	MALE	80	Unknown	Unknown	WHITE	Stage IIIB	T4b	N1a	M0	Extremities
TCGA-EE-A2GR	MALE	78	Unknown	Unknown	WHITE	Stage II	T4	N0	M0	Extremities|Extremities
TCGA-EE-A2GS	FEMALE	28	Unknown	Unknown	WHITE	Stage IB	T2a	N0	M0	Extremities
TCGA-EE-A2GT	MALE	77	Unknown	Unknown	WHITE	Stage IIA	T3a	N0	M0	Trunk
TCGA-EE-A2GU	FEMALE	65	Unknown	Unknown	WHITE	Stage IA	T1a	N0	M0	Extremities
TCGA-EE-A2M5	MALE	49	Unknown	Unknown	WHITE	Stage I	T2	N0	M0	Trunk
TCGA-EE-A2M6	MALE	61	Unknown	Unknown	WHITE	Stage I	T1	N0	M0	Trunk
TCGA-EE-A2M7	MALE	66	Unknown	Unknown	WHITE	Stage II	T3a	N0	M0	Trunk
TCGA-EE-A2M8	FEMALE	54	Unknown	Unknown	WHITE	Stage III	T3a	N1	M0	Extremities
TCGA-EE-A2MC	MALE	73	Unknown	Unknown	WHITE	Stage I	T2	N0	M0	Extremities
TCGA-EE-A2MD	MALE	52	Unknown	Unknown	WHITE	Stage II	T3a	N0	M0	Extremities
TCGA-EE-A2ME	MALE	51	Unknown	Unknown	WHITE	Stage I	T2	N0	M0	Trunk
TCGA-EE-A2MF	FEMALE	39	Unknown	Unknown	WHITE	Stage I	T2	N0	M0	Extremities
TCGA-EE-A2MG	MALE	23	Unknown	Unknown	WHITE	Stage I	T2	N0	M0	Trunk
TCGA-EE-A2MH	MALE	66	Unknown	Unknown	WHITE	Stage III	T4a	N0	M0	Trunk
TCGA-EE-A2MI	MALE	43	Unknown	Unknown	WHITE	Stage IIB	T4	N0	M0	Extremities
TCGA-EE-A2MJ	MALE	60	Unknown	Unknown	WHITE	Stage III	T4b	N0	M0	Trunk
TCGA-EE-A2MK	FEMALE	18	Unknown	Unknown	WHITE	Stage III	T4a	N0	M0	Extremities
TCGA-EE-A2ML	MALE	35	Unknown	Unknown	WHITE	Stage II	T3a	N0	M0	Trunk
TCGA-EE-A2MM	FEMALE	63	Unknown	Unknown	WHITE	Stage I	T2	N0	M0	Trunk
TCGA-EE-A2MN	MALE	58	Unknown	Unknown	WHITE	Stage I	T2	N0	M0	Trunk
TCGA-EE-A2MP	FEMALE	34	Unknown	Unknown	WHITE	Stage I	T2	N0	M0	Extremities
TCGA-EE-A2MQ	FEMALE	70	Unknown	Unknown	WHITE	Stage IIIA	T3a	N2a	M0	Trunk
TCGA-EE-A2MR	MALE	61	Unknown	Unknown	WHITE	Stage I	T2	N0	M0	Trunk
TCGA-EE-A2MS	MALE	72	Unknown	Unknown	WHITE	Stage II	T3a	N0	M0	Extremities
TCGA-EE-A2MT	MALE	45	Unknown	Unknown	WHITE	Stage IB	T2a	N0	M0	Trunk
TCGA-EE-A2MU	MALE	71	Unknown	Unknown	WHITE	Stage IA	T1a	N0	M0	Extremities
TCGA-EE-A3AA	MALE	47	Unknown	Unknown	WHITE	Stage III	T0	N2a	M0	Unknown
TCGA-EE-A3AB	MALE	30	Unknown	Unknown	WHITE	Stage III	T0	N2a	M0	Unknown
TCGA-EE-A3AC	MALE	47	Unknown	Unknown	WHITE	Stage III	T0	N2b	M0	Unknown
TCGA-EE-A3AD	MALE	50	Unknown	Unknown	WHITE	Stage III	T0	N1b	M0	Unknown
TCGA-EE-A3AF	FEMALE	48	Unknown	Unknown	WHITE	Stage IIIC	T0	N3	M0	Unknown
TCGA-EE-A3AG	MALE	25	Unknown	Unknown	WHITE	Stage III	T0	N2c	M0	Unknown
TCGA-EE-A3AH	MALE	30	Unknown	Unknown	WHITE	Stage II	T3b	N0	M0	Extremities
TCGA-EE-A3J3	MALE	42	Unknown	Unknown	WHITE	Stage IB	T2	N0	M0	Trunk
TCGA-EE-A3J4	MALE	72	Unknown	Unknown	WHITE	Stage II	T3a	N0	M0	Extremities
TCGA-EE-A3J5	MALE	71	Unknown	Unknown	WHITE	Stage III	T4a	N1	M0	Extremities
TCGA-EE-A3J7	MALE	43	Unknown	Unknown	WHITE	Stage I	T2	N0	M0	Trunk
TCGA-EE-A3J8	MALE	59	Unknown	Unknown	WHITE	Stage IIIA	T4a	N1a	M0	Trunk
TCGA-EE-A3JA	MALE	44	Unknown	Unknown	WHITE	Stage IB	T2a	N0	M0	Extremities
TCGA-EE-A3JB	FEMALE	60	Unknown	Unknown	WHITE	Stage III	T3a	N1	M0	Extremities
TCGA-EE-A3JD	MALE	70	Unknown	Unknown	WHITE	Stage III	TX	N2b	M0	Unknown
TCGA-EE-A3JE	MALE	75	Unknown	Unknown	WHITE	Stage IIIB	T3b	N1a	M0	Trunk
TCGA-EE-A3JH	MALE	54	Unknown	Unknown	WHITE	Stage IB	T2	N0	M0	Trunk
TCGA-EE-A3JI	MALE	48	Unknown	Unknown	WHITE	Stage I	T2	N0	M0	Extremities|Trunk
TCGA-ER-A193	MALE	62	Unknown	Unknown	WHITE	Stage IIB	T3b	N0	M0	Head and Neck
TCGA-ER-A194	MALE	77	Unknown	Unknown	WHITE	Unknown	Unknown	N0	M0	Other Specify
TCGA-ER-A195	MALE	46	Unknown	Unknown	WHITE	Unknown	TX	N0	M0	Trunk
TCGA-ER-A196	FEMALE	64	Unknown	Unknown	WHITE	Stage IIC	T4b	N0	M0	Extremities
TCGA-ER-A197	FEMALE	83	Unknown	Unknown	WHITE	Stage IIIB	T4b	N1a	M0	Other Specify
TCGA-ER-A198	MALE	45	Unknown	Unknown	WHITE	Unknown	Unknown	NX	M0	Other Specify
TCGA-ER-A199	FEMALE	86	Unknown	Unknown	WHITE	Stage IIIC	T4b	N3	M0	Extremities
TCGA-ER-A19A	MALE	79	Unknown	Unknown	WHITE	Stage IV	TX	N0	M1	Unknown
TCGA-ER-A19B	MALE	42	Unknown	Unknown	WHITE	Unknown	TX	N0	M0	Trunk
TCGA-ER-A19C	MALE	77	Unknown	Unknown	WHITE	Stage I	T2a	NX	M0	Trunk
TCGA-ER-A19D	FEMALE	46	Unknown	Unknown	WHITE	Stage IB	T2a	N0	M0	Trunk
TCGA-ER-A19E	FEMALE	36	Unknown	Unknown	WHITE	Stage IB	T2a	N0	M0	Extremities
TCGA-ER-A19F	MALE	82	Unknown	Unknown	WHITE	Unknown	Unknown	N0	M0	Extremities
TCGA-ER-A19G	FEMALE	48	Unknown	Unknown	WHITE	Unknown	Unknown	N0	M0	Extremities
TCGA-ER-A19H	MALE	40	Unknown	Unknown	WHITE	Unknown	Unknown	N0	M0	Trunk
TCGA-ER-A19J	MALE	54	Unknown	Unknown	WHITE	Stage IV	TX	N3	M1	Unknown
TCGA-ER-A19K	FEMALE	79	Unknown	Unknown	WHITE	Stage IIC	T4b	N0	M0	Head and Neck
TCGA-ER-A19L	MALE	35	Unknown	Unknown	WHITE	Unknown	Unknown	Unknown	Unknown	Extremities
TCGA-ER-A19M	MALE	36	Unknown	Unknown	WHITE	Stage IB	T2a	N0	M0	Extremities
TCGA-ER-A19N	MALE	47	Unknown	Unknown	WHITE	Unknown	Unknown	Unknown	Unknown	Unknown
TCGA-ER-A19O	MALE	56	Unknown	Unknown	WHITE	Stage IIIB	T3b	N1b	M0	Trunk
TCGA-ER-A19P	FEMALE	47	Unknown	Unknown	WHITE	Unknown	Unknown	N0	M0	Extremities
TCGA-ER-A19Q	FEMALE	37	Unknown	Unknown	WHITE	Unknown	Unknown	N0	M0	Extremities
TCGA-ER-A19S	FEMALE	81	Unknown	Unknown	WHITE	Unknown	Unknown	Unknown	Unknown	Unknown
TCGA-ER-A19T	MALE	51	167	78	WHITE	Stage IV	T4a	N3	M1a	Extremities
TCGA-ER-A19W	FEMALE	48	Unknown	Unknown	WHITE	Unknown	Unknown	Unknown	Unknown	Trunk
TCGA-ER-A1A1	MALE	58	Unknown	Unknown	WHITE	Stage IIIC	TX	N3	M0	Unknown
TCGA-ER-A2NB	MALE	57	Unknown	Unknown	WHITE	Stage IIIB	T4b	N2	M0	Other Specify
TCGA-ER-A2NC	MALE	50	Unknown	Unknown	WHITE	Stage IB	T2a	N0	M0	Extremities
TCGA-ER-A2ND	FEMALE	57	Unknown	Unknown	WHITE	Stage IIIC	T1b	N3	M0	Extremities
TCGA-ER-A2NE	MALE	39	Unknown	Unknown	WHITE	Stage 0	Tis	N0	M0	Extremities
TCGA-ER-A2NF	MALE	53	Unknown	Unknown	WHITE	Stage IIIB	T3b	N3	M0	Head and Neck
TCGA-ER-A2NG	FEMALE	43	Unknown	Unknown	WHITE	Stage IIIC	T3b	N3	M0	Trunk
TCGA-ER-A2NH	MALE	49	Unknown	Unknown	WHITE	Stage IIIC	T3a	N3	M0	Trunk
TCGA-ER-A3ES	MALE	25	Unknown	Unknown	WHITE	Unknown	Unknown	Unknown	Unknown	Extremities
TCGA-ER-A3ET	FEMALE	64	Unknown	Unknown	WHITE	Stage IIIA	T3a	N1a	M0	Other Specify
TCGA-ER-A3EV	MALE	55	182	90	WHITE	Stage III	T4	N0	M0	Extremities
TCGA-ER-A3PL	MALE	30	Unknown	Unknown	WHITE	Stage IV	T3b	N0	M1a	Extremities
TCGA-ER-A42H	MALE	76	Unknown	Unknown	WHITE	Unknown	Unknown	Unknown	Unknown	Other Specify
TCGA-ER-A42K	FEMALE	40	Unknown	Unknown	WHITE	Stage IIIC	T4b	N3	M0	Extremities
TCGA-ER-A42L	MALE	49	Unknown	Unknown	WHITE	Stage II	T3	N0	M0	Other Specify
TCGA-FR-A2OS	FEMALE	49	164	84	WHITE	Stage IIC	T4b	N0	M0	Extremities
TCGA-FR-A3R1	MALE	69	178	84	WHITE	Stage IIC	T4b	N0	M0	Extremities
TCGA-FR-A3YN	MALE	44	179	89	WHITE	Stage IB	T2a	N0	M0	Extremities
TCGA-FR-A3YO	FEMALE	Unknown	165	48	WHITE	I/II NOS	T2	N0	M0	Extremities
TCGA-FR-A69P	FEMALE	34	173	76	WHITE	Stage IIIC	TX	N3	Unknown	Unknown
TCGA-FR-A728	FEMALE	54	165	87	WHITE	Stage IIIB	T4b	N2a	M0	Extremities
TCGA-FR-A7U8	MALE	50	183	75	WHITE	Stage IIIC	TX	N3	M0	Unknown
TCGA-FR-A7U9	FEMALE	63	160	67	WHITE	Stage IIIC	T3b	N3	M0	Extremities
TCGA-FR-A7UA	FEMALE	65	162	87	WHITE	Stage IB	T2a	N0	M0	Extremities
TCGA-FR-A8YC	MALE	78	168	74	WHITE	Stage IIB	T3b	N0	M0	Extremities
TCGA-FR-A8YD	FEMALE	56	158	77	WHITE	Stage IIC	T4b	N0	M0	Other Specify
TCGA-FR-A8YE	MALE	41	175	79	WHITE	Stage IA	T1a	N0	M0	Trunk
TCGA-FS-A1YW	MALE	52	Unknown	Unknown	WHITE	Stage IB	T1b	N0	M0	Trunk
TCGA-FS-A1YX	FEMALE	39	Unknown	Unknown	WHITE	Stage I	T2	N0	M0	Trunk
TCGA-FS-A1YY	FEMALE	55	Unknown	Unknown	WHITE	Stage IIA	T3a	N0	M0	Trunk
TCGA-FS-A1Z0	FEMALE	32	Unknown	Unknown	WHITE	Stage IA	T1a	N0	M0	Extremities
TCGA-FS-A1Z3	FEMALE	72	Unknown	Unknown	WHITE	Stage IV	TX	N0	M1	Unknown
TCGA-FS-A1Z4	MALE	62	Unknown	Unknown	WHITE	Stage I	T1	N0	M0	Extremities
TCGA-FS-A1Z7	MALE	19	Unknown	Unknown	WHITE	Stage IIIC	T4b	N1b	M0	Head and Neck
TCGA-FS-A1ZA	FEMALE	45	Unknown	Unknown	WHITE	Stage IIIB	T4b	N2c	M0	Trunk
TCGA-FS-A1ZB	MALE	57	Unknown	Unknown	WHITE	Stage II	T3a	N0	M0	Trunk
TCGA-FS-A1ZC	MALE	51	Unknown	Unknown	WHITE	I/II NOS	TX	N0	M0	Trunk
TCGA-FS-A1ZD	MALE	63	Unknown	Unknown	WHITE	Stage IIA	T2b	N0	M0	Extremities
TCGA-FS-A1ZE	MALE	40	Unknown	Unknown	WHITE	Stage IIC	T4b	N0	M0	Trunk
TCGA-FS-A1ZF	FEMALE	78	Unknown	Unknown	WHITE	Stage IIC	T4b	N0	M0	Extremities
TCGA-FS-A1ZG	FEMALE	60	Unknown	Unknown	WHITE	Stage IIIC	T4b	N2b	M0	Extremities
TCGA-FS-A1ZH	FEMALE	71	Unknown	Unknown	WHITE	Stage IV	T3b	N2c	M1c	Extremities
TCGA-FS-A1ZJ	FEMALE	75	Unknown	Unknown	WHITE	Stage I	T2	N0	M0	Trunk
TCGA-FS-A1ZK	MALE	68	Unknown	Unknown	WHITE	Stage II	T4	N0	M0	Head and Neck
TCGA-FS-A1ZM	MALE	74	Unknown	Unknown	WHITE	Stage III	T2	N2c	M0	Extremities
TCGA-FS-A1ZN	MALE	43	Unknown	Unknown	WHITE	Stage IIIA	T4b	N1a	M0	Trunk
TCGA-FS-A1ZP	MALE	52	Unknown	Unknown	WHITE	Stage II	T3	N0	M0	Extremities
TCGA-FS-A1ZQ	MALE	31	Unknown	Unknown	WHITE	I/II NOS	TX	N0	M0	Extremities
TCGA-FS-A1ZR	MALE	36	Unknown	Unknown	WHITE	Stage II	T2	N0	M0	Trunk
TCGA-FS-A1ZS	MALE	54	Unknown	Unknown	WHITE	Stage I	T2	N0	M0	Trunk
TCGA-FS-A1ZT	MALE	55	Unknown	Unknown	WHITE	Stage III	T2	N1b	M0	Extremities
TCGA-FS-A1ZU	FEMALE	70	Unknown	Unknown	WHITE	Stage IIC	T4b	N0	M0	Extremities
TCGA-FS-A1ZW	MALE	65	Unknown	Unknown	WHITE	Stage IIIB	T2b	N1a	M0	Extremities
TCGA-FS-A1ZY	MALE	71	Unknown	Unknown	WHITE	Stage IIB	T3b	N0	M0	Trunk
TCGA-FS-A1ZZ	FEMALE	54	Unknown	Unknown	WHITE	Stage IIB	T3b	N0	M0	Trunk
TCGA-FS-A4F0	FEMALE	67	Unknown	Unknown	WHITE	Stage IIB	T4a	N0	M0	Trunk
TCGA-FS-A4F4	MALE	64	Unknown	Unknown	WHITE	Stage II	T3a	N0	M0	Extremities
TCGA-FS-A4F5	FEMALE	77	Unknown	Unknown	WHITE	Stage IB	T2a	N0	M0	Extremities
TCGA-FS-A4F8	MALE	52	Unknown	Unknown	WHITE	Stage I	T1	N0	M0	Extremities
TCGA-FS-A4FB	FEMALE	46	Unknown	Unknown	WHITE	Stage III	T2	N1a	M0	Extremities
TCGA-FS-A4FD	MALE	39	Unknown	Unknown	WHITE	Stage IIIC	T2	N3	M0	Trunk|Unknown
TCGA-FW-A3I3	FEMALE	59	173	105	WHITE	Stage IV	Unknown	N0	M1	Unknown
TCGA-FW-A3R5	MALE	68	Unknown	Unknown	WHITE	Stage III	TX	N2	M0	Head and Neck
TCGA-FW-A3TU	FEMALE	72	Unknown	Unknown	WHITE	Unknown	Unknown	Unknown	Unknown	Trunk
TCGA-FW-A3TV	FEMALE	57	165	86	WHITE	Stage IIIB	T1	N2b	M0	Trunk
TCGA-FW-A5DX	MALE	71	Unknown	Unknown	WHITE	Stage IIIC	T4a	N3	Unknown	Trunk
TCGA-GF-A2C7	MALE	48	Unknown	Unknown	WHITE	Stage IIC	T4b	N0	M0	Head and Neck
TCGA-GF-A3OT	FEMALE	58	Unknown	66	WHITE	Stage IIIC	T3	N3	M0	Extremities
TCGA-GF-A4EO	FEMALE	74	166	105	WHITE	Stage IIIC	T0	N3	M0	Unknown
TCGA-GF-A769	MALE	39	182	88	WHITE	Stage IIC	T4b	NX	M0	Extremities
TCGA-GN-A262	FEMALE	47	159	72	WHITE	Unknown	Unknown	Unknown	Unknown	Trunk
TCGA-GN-A263	MALE	24	170	92	WHITE	Stage IV	T4b	N3	M1c	Trunk
TCGA-GN-A264	MALE	60	Unknown	104	WHITE	Unknown	Unknown	Unknown	Unknown	Extremities
TCGA-GN-A265	MALE	53	Unknown	85	WHITE	Unknown	Unknown	Unknown	Unknown	Unknown
TCGA-GN-A266	MALE	45	173	103	WHITE	Unknown	Unknown	Unknown	Unknown	Unknown
TCGA-GN-A267	MALE	38	167	96	WHITE	Stage IIIA	T4a	N1a	M0	Trunk
TCGA-GN-A268	FEMALE	83	155	55	WHITE	Stage IIB	T4a	N0	M0	Extremities
TCGA-GN-A26A	FEMALE	63	165	66	WHITE	Stage IIIA	T3a	N1a	M0	Trunk
TCGA-GN-A26C	MALE	77	Unknown	101	WHITE	Stage IIIC	T4b	N2b	M0	Trunk
TCGA-GN-A26D	FEMALE	72	156	68	WHITE	Stage IIC	T4b	N0	Unknown	Extremities
TCGA-GN-A4U3	MALE	30	180	84	WHITE	Stage III	T3a	N1a	M0	Extremities
TCGA-GN-A4U4	MALE	73	175	85	WHITE	Stage IIA	T2b	NX	M0	Trunk
TCGA-GN-A4U5	FEMALE	61	157	84	WHITE	Stage IB	T2a	NX	M0	Trunk
TCGA-GN-A4U7	FEMALE	56	161	48	WHITE	Stage IIIC	T2b	N3	M0	Extremities
TCGA-GN-A4U8	MALE	51	180	Unknown	WHITE	Unknown	Unknown	Unknown	Unknown	Trunk
TCGA-GN-A4U9	MALE	71	176	104	WHITE	Stage IIIC	T2b	N3	M0	Extremities
TCGA-GN-A8LK	MALE	70	175	93	WHITE	Stage IB	T1b	NX	Unknown	Head and Neck
TCGA-GN-A8LL	FEMALE	68	154	89	WHITE	Stage IIC	T4b	NX	M0	Extremities
TCGA-GN-A8LN	MALE	68	180	108	WHITE	Stage IIC	T4b	NX	M0	Trunk
TCGA-GN-A9SD	FEMALE	59	158	97	WHITE	Stage IA	T1a	NX	M0	Extremities
TCGA-HR-A2OG	FEMALE	50	Unknown	Unknown	[Not Evaluated]	Unknown	Unknown	Unknown	Unknown	Extremities
TCGA-HR-A2OH	FEMALE	46	169	Unknown	[Not Evaluated]	Stage IIIB	T3b	N2a	M0	Extremities
TCGA-HR-A5NC	FEMALE	90	152	Unknown	[Not Evaluated]	Unknown	T4	NX	M0	Trunk
TCGA-IH-A3EA	MALE	61	175	81	WHITE	Stage IIC	T4b	N0	M0	Head and Neck
TCGA-LH-A9QB	FEMALE	24	160	86	WHITE	Unknown	Unknown	Unknown	Unknown	Trunk
TCGA-OD-A75X	MALE	49	182	103	WHITE	Unknown	TX	NX	M0	Trunk
TCGA-QB-A6FS	MALE	49	184	78	WHITE	Stage IIIC	T0	N3	M0	Unknown
TCGA-QB-AA9O	MALE	73	180	119	WHITE	Stage IIIC	TX	N3	M0	Unknown
TCGA-RP-A690	FEMALE	66	162	49	WHITE	Unknown	Unknown	Unknown	Unknown	Unknown
TCGA-RP-A693	MALE	77	178	81	WHITE	Stage IV	TX	NX	M1c	Unknown
TCGA-RP-A694	MALE	71	185	99	WHITE	Stage IV	TX	NX	M1c	Unknown
TCGA-RP-A695	MALE	Unknown	182	95	WHITE	Stage IV	TX	NX	M1c	Head and Neck
TCGA-RP-A6K9	FEMALE	Unknown	162	48	WHITE	Unknown	Unknown	Unknown	Unknown	Unknown
TCGA-W3-A824	MALE	63	170	79	WHITE	Stage I	T2	N0	M0	Trunk
TCGA-W3-A825	FEMALE	60	162	77	WHITE	Stage II	T3	N0	M0	Extremities
TCGA-W3-A828	MALE	66	180	91	WHITE	Stage II	T3	N0	M0	Head and Neck
TCGA-W3-AA1O	MALE	85	183	89	WHITE	Stage III	TX	N2	M0	Unknown
TCGA-W3-AA1Q	MALE	57	178	73	WHITE	Stage III	TX	N1	M0	Unknown
TCGA-W3-AA1R	MALE	71	180	86	WHITE	Stage II	T3	N0	M0	Head and Neck
TCGA-W3-AA1V	MALE	63	180	91	WHITE	Stage II	T3	N0	M0	Other Specify
TCGA-W3-AA1W	MALE	64	170	101	WHITE	Stage II	T3	N0	M0	Trunk
TCGA-W3-AA21	MALE	26	175	99	WHITE	Stage I	T2	N0	M0	Extremities
TCGA-WE-A8JZ	MALE	70	Unknown	Unknown	[Not Evaluated]	Stage IIIB	T4b	N1a	M0	Extremities
TCGA-WE-A8K1	MALE	74	Unknown	Unknown	WHITE	Stage IIIC	T3b	N3	M0	Extremities
TCGA-WE-A8K5	MALE	65	Unknown	Unknown	WHITE	Stage IV	T2a	N3	M1c	Extremities
TCGA-WE-A8K6	MALE	79	Unknown	Unknown	WHITE	Stage IIIB	TX	N1b	M0	Trunk
TCGA-WE-A8ZM	MALE	70	Unknown	Unknown	WHITE	Stage IIIB	TX	N1b	M0	Extremities
TCGA-WE-A8ZN	MALE	57	Unknown	Unknown	[Not Evaluated]	Stage IIB	T4a	NX	M0	Extremities
TCGA-WE-A8ZO	FEMALE	73	Unknown	Unknown	[Not Evaluated]	Stage IIIB	T3a	N1b	M0	Extremities
TCGA-WE-A8ZQ	MALE	48	Unknown	Unknown	[Not Evaluated]	Stage IIA	T3a	N0	M0	Extremities
TCGA-WE-A8ZR	MALE	49	Unknown	Unknown	WHITE	Stage IIIC	T4b	N1b	M0	Trunk
TCGA-WE-A8ZT	FEMALE	25	Unknown	Unknown	WHITE	Stage IV	T3b	N1b	M1b	Trunk
TCGA-WE-A8ZY	MALE	62	Unknown	Unknown	WHITE	Stage IIA	T3a	NX	M0	Trunk
TCGA-WE-AA9Y	MALE	37	Unknown	Unknown	WHITE	Stage IIIC	T2a	N3	M0	Extremities
TCGA-WE-AAA0	MALE	47	Unknown	Unknown	WHITE	Stage IA	T1a	N0	M0	Head and Neck
TCGA-WE-AAA3	FEMALE	84	Unknown	Unknown	WHITE	Stage IIIC	T4b	N2b	M0	Extremities
TCGA-WE-AAA4	FEMALE	56	Unknown	Unknown	WHITE	Stage IIIC	TX	N3	M0	Extremities
TCGA-XV-A9VZ	FEMALE	90	158	52	WHITE	Stage II	T4	N0	M0	Other Specify
TCGA-XV-A9W2	MALE	81	157	56	WHITE	Stage I	T1	N0	M0	Extremities
TCGA-XV-A9W5	MALE	51	180	105	WHITE	I/II NOS	T2	N0	M0	Extremities
TCGA-XV-AAZV	FEMALE	56	172	83	WHITE	Stage II	T4	N0	M0	Trunk
TCGA-XV-AAZW	FEMALE	62	170	74	WHITE	Stage II	T4	N0	M0	Extremities
TCGA-XV-AAZY	FEMALE	76	167	67	WHITE	Stage IIIC	T4	N3	M0	Trunk
TCGA-XV-AB01	FEMALE	54	164	78	WHITE	Stage II	T3	NX	M0	Head and Neck
TCGA-YD-A89C	FEMALE	43	164	59	WHITE	Stage IA	T1a	NX	M0	Extremities
TCGA-YD-A9TA	MALE	75	175	67	WHITE	Unknown	Unknown	Unknown	Unknown	Head and Neck
TCGA-YD-A9TB	FEMALE	Unknown	162	56	WHITE	Unknown	Unknown	Unknown	Unknown	Head and Neck
TCGA-YG-AA3N	MALE	67	152	80	Unknown	Stage IIC	T4b	N0	M0	Trunk
TCGA-YG-AA3O	MALE	62	173	92	Unknown	Unknown	Unknown	Unknown	Unknown	Trunk
TCGA-YG-AA3P	FEMALE	63	160	64	Unknown	Stage IIB	T4a	N0	M0	Extremities
TCGA-Z2-A8RT	FEMALE	42	155	77	WHITE	Stage IIB	T3b	N0	M0	Extremities
TCGA-Z2-AA3S	MALE	58	172	78	WHITE	Stage IA	T1a	N0	M0	Trunk
TCGA-Z2-AA3V	FEMALE	57	166	63	WHITE	Stage IA	T1a	N0	M0	Trunk
