# Supplementary material for: Better prognostic determination and feature characterization of cutaneous melanoma through integrative genomic analysis
Source: Aging (Albany NY). 2019 Jul 18;11(14):5081–107. doi: 10.18632/aging.102099 (PMC6746212; doi:10.18632/aging.102099)
Supplement: Supplementary Table 4 [file aging-11-102099-s001.xls]

## Sheet: Survival_Genes
Supplementary Table S4. Association of upregulated gene expression with OS, and validation in three GEO cohorts.
Entrez Gene ID1	GENCODE Gene ID2	P value3	Hazard ratio	GSE19234		GSE22153		GSE53118
				P value4	Hazard ratio4	P value4	Hazard ratio4	P value4	Hazard ratio4
10010	ENSG00000136560.12	0.000187444	2.36207	/	/	/	/	/	/
100130231	ENSG00000245164.5	0.00248349	1.92044	/	/	/	/	/	/
100131117	ENSG00000241560.4	0.0416915	1.5598	/	/	/	/	/	/
100505741	ENSG00000122432.15	0.00655783	1.87728	/	/	/	/	/	/
100506060	ENSG00000261556.7	0.031957	1.64571	/	/	/	/	/	/
100506516	ENSG00000281404.1	0.0087325	1.82815	/	/	/	/	/	/
100506736	ENSG00000205045.7	0.00233364	1.9599	/	/	/	/	/	/
100507347	ENSG00000229124.5	0.00275092	1.97532	/	/	/	/	/	/
100996941	ENSG00000227145.1	0.0402401	1.5972	/	/	/	/	/	/
10125	ENSG00000172575.10	0.0136003	1.72931	/	/	0.00455294	2.85579	/	/
101927156	ENSG00000234663.4	0.00555569	1.86789	/	/	/	/	/	/
101927592	ENSG00000249345.5	0.0236725	1.63838	/	/	/	/	/	/
101927601	ENSG00000278662.3	0.0478115	1.57351	/	/	/	/	/	/
101928882	ENSG00000145075.10	0.0250956	1.67153	/	/	/	/	/	/
101929302	ENSG00000232104.3	0.0162009	1.70311	/	/	/	/	/	/
102723809	ENSG00000259116.1	0.0234341	1.68412	/	/	/	/	/	/
102724106	ENSG00000121380.11	0.00219774	1.99571	/	/	/	/	/	/
102724814	ENSG00000258727.1	0.00215646	2.06339	/	/	/	/	/	/
10308	ENSG00000185947.13	0.00874521	1.85372	/	/	/	/	/	/
10346	ENSG00000132274.14	0.00112072	2.04763	/	/	0.0158019	2.38002	/	/
103625684	ENSG00000206965.1	0.0040169	1.93231	/	/	/	/	/	/
103724390	ENSG00000234722.3	0.0469508	1.57809	/	/	/	/	/	/
10561	ENSG00000137965.9	0.0132204	1.77361	/	/	/	/	/	/
10563	ENSG00000156234.7	0.00180293	1.96966	0.00357041	7.05196	/	/	/	/
10673	ENSG00000102524.10	0.034089	1.60386	/	/	0.00321137	2.79537	0.0331758	2.35812
10859	ENSG00000104972.13	0.0132803	1.77007	/	/	/	/	/	/
10866	ENSG00000206337.9	9.00373e-05	2.40844	0.0146798	5.48835	0.00565479	2.68224	/	/
11262	ENSG00000079263.17	0.00305258	1.91138	0.0239619	4.99451	/	/	/	/
113201	ENSG00000166734.17	0.000384192	2.18437	/	/	/	/	/	/
113263	ENSG00000106415.11	0.0128332	1.77674	/	/	/	/	/	/
114614	ENSG00000234883.3	0.00721171	1.80555	/	/	/	/	/	/
115004	ENSG00000164430.14	0.0235053	1.61822	/	/	/	/	/	/
115352	ENSG00000160856.19	0.0133669	1.72875	/	/	0.00374537	2.97356	0.0416474	2.08123
115361	ENSG00000162654.8	0.00077567	2.17502	/	/	0.00355713	2.8872	/	/
115362	ENSG00000154451.13	0.00156668	2.02122	/	/	/	/	/	/
117155	ENSG00000166762.15	1.11073e-05	2.70575	/	/	/	/	/	/
117178	ENSG00000117155.15	0.00114691	2.08456	/	/	/	/	/	/
118788	ENSG00000155629.13	0.0343124	1.61694	/	/	/	/	/	/
118932	ENSG00000152766.5	0.00702957	1.83406	/	/	/	/	0.017759	2.46476
1193	ENSG00000155962.11	0.00698716	1.83548	/	/	0.0078674	2.56433	0.0406667	2.09156
121355	ENSG00000170627.8	0.00962149	1.81802	/	/	/	/	/	/
123036	ENSG00000165929.11	0.00026269	2.23284	/	/	0.00177526	3.35605	/	/
1237	ENSG00000179934.6	0.0233948	1.65942	/	/	0.0194704	2.36015	/	/
126068	ENSG00000197044.9	0.00631998	1.86433	/	/	/	/	/	/
128611	ENSG00000124203.5	0.00204703	1.93377	0.00894417	4.46878	0.000507558	3.59133	/	/
130872	ENSG00000173209.21	0.0363567	1.66594	/	/	/	/	/	/
132720	ENSG00000174749.5	0.0428769	1.5682	/	/	/	/	/	/
139716	ENSG00000160219.10	0.00235261	1.96219	/	/	0.0159376	2.50887	/	/
139818	ENSG00000147251.14	0.00290137	1.89232	/	/	/	/	/	/
1439	ENSG00000100368.12	0.0156992	1.67916	0.0361075	3.70213	/	/	/	/
149699	ENSG00000124196.5	0.0347708	1.62525	/	/	0.0301314	2.26294	/	/
150962	ENSG00000162927.12	0.000800772	2.17863	/	/	/	/	/	/
151556	ENSG00000163328.12	0.0117986	1.74497	/	/	/	/	/	/
151636	ENSG00000163840.8	0.00354064	1.97855	/	/	/	/	/	/
152789	ENSG00000152969.15	0.00316532	1.92417	0.0243738	3.91457	/	/	/	/
1536	ENSG00000165168.7	0.0025747	1.95101	/	/	/	/	0.0353182	2.23453
1540	ENSG00000083799.16	0.000628056	2.12169	/	/	/	/	/	/
154075	ENSG00000164483.15	0.00287247	1.9348	/	/	0.0101791	2.57186	/	/
158219	ENSG00000155158.19	0.0134574	1.713	/	/	/	/	/	/
158801	ENSG00000233382.6	0.00631404	1.86615	/	/	/	/	/	/
161835	ENSG00000150667.6	0.0115658	1.68932	/	/	/	/	/	/
163486	ENSG00000213047.10	0.0013907	2.03836	/	/	0.00991312	2.55304	/	/
164118	ENSG00000187862.10	0.00271058	1.96085	/	/	/	/	/	/
168537	ENSG00000179144.4	0.00728887	1.81126	/	/	0.0238285	2.22225	/	/
1733	ENSG00000211452.9	0.0313177	1.63214	/	/	/	/	/	/
1741	ENSG00000082458.10	0.00237307	1.93246	/	/	/	/	/	/
1806	ENSG00000188641.11	0.000119102	2.24811	/	/	/	/	/	/
1848	ENSG00000139318.7	0.0105528	1.79373	/	/	/	/	/	/
197135	ENSG00000229474.5	0.000265988	2.39639	/	/	0.000459757	3.83802	0.0165613	2.62351
2004	ENSG00000111145.6	0.0357446	1.56421	/	/	/	/	/	/
200844	ENSG00000163689.17	0.0310764	1.65665	0.0451337	4.36045	/	/	/	/
200894	ENSG00000169379.14	0.00400099	1.93461	/	/	/	/	/	/
201633	ENSG00000181847.10	0.00305582	1.91754	/	/	/	/	/	/
201798	ENSG00000169989.2	0.00490512	1.9204	/	/	/	/	/	/
2123	ENSG00000126860.10	0.00186051	2.01118	/	/	/	/	/	/
2124	ENSG00000185862.6	0.00133065	1.97159	0.00950942	5.98498	/	/	/	/
219285	ENSG00000177409.10	3.02544e-06	2.87711	/	/	0.0127246	2.41431	/	/
219749	ENSG00000175395.14	0.000117012	2.46355	/	/	/	/	/	/
221178	ENSG00000182957.14	2.35778e-05	2.72316	0.00388904	5.67953	/	/	0.0174391	2.59694
221322	ENSG00000146350.12	0.00839991	1.87241	0.0225157	4.10127	/	/	/	/
2214	ENSG00000203747.8	0.0178549	1.73461	/	/	/	/	/	/
223082	ENSG00000180233.10	0.000273757	2.26547	/	/	/	/	/	/
225	ENSG00000173208.3	0.00204657	1.93195	/	/	0.0350798	2.17988	/	/
22797	ENSG00000105967.14	0.00364336	1.90261	/	/	/	/	/	/
22806	ENSG00000161405.15	0.0138898	1.68985	/	/	/	/	/	/
22875	ENSG00000001561.6	0.00997091	1.76022	0.0218296	5.12854	/	/	/	/
22914	ENSG00000213809.7	0.00066571	2.11991	/	/	/	/	/	/
22936	ENSG00000118985.13	0.00219169	1.92635	/	/	/	/	/	/
23074	ENSG00000111647.11	0.00356878	1.97621	/	/	/	/	/	/
23285	ENSG00000069712.10	0.00530572	1.89636	/	/	/	/	/	/
23443	ENSG00000117620.11	0.0293165	1.69547	/	/	/	/	/	/
23586	ENSG00000107201.8	0.00108362	2.07574	/	/	/	/	/	/
245	ENSG00000262943.6	0.00104225	2.13447	/	/	/	/	/	/
253018	ENSG00000206344.6	0.00703732	1.82356	0.0301818	2.90391	/	/	/	/
2533	ENSG00000082074.14	0.0124141	1.7202	/	/	0.00942127	2.59027	/	/
254887	ENSG00000184307.12	0.01686	1.68636	/	/	/	/	/	/
255231	ENSG00000153898.11	0.000667427	2.16416	/	/	/	/	/	/
257068	ENSG00000240891.5	0.0123816	1.73681	/	/	/	/	/	/
25801	ENSG00000115271.9	0.00781857	1.80904	/	/	/	/	/	/
25816	ENSG00000145779.7	0.0136325	1.69108	0.0302085	4.74856	/	/	/	/
259230	ENSG00000198964.12	0.0479119	1.56056	/	/	/	/	/	/
259295	ENSG00000255837.1	0.0490148	1.61432	/	/	/	/	/	/
26157	ENSG00000106560.9	0.00128244	2.03072	/	/	/	/	/	/
26191	ENSG00000134242.14	0.000182133	2.24492	/	/	/	/	/	/
2633	ENSG00000117228.9	0.0018596	2.05734	/	/	0.0195835	2.28281	0.0416827	2.35864
2634	ENSG00000162645.11	0.000176074	2.34094	0.0359705	3.6676	0.00226755	3.15257	/	/
2635	ENSG00000117226.10	0.00214866	2.04835	/	/	0.0332312	2.19782	/	/
2643	ENSG00000131979.17	0.0017136	2.01567	/	/	/	/	/	/
2650	ENSG00000187210.11	0.000192584	2.25111	0.00686181	5.05483	/	/	/	/
27040	ENSG00000213658.9	0.00808325	1.81435	0.0429539	3.24942	/	/	/	/
27071	ENSG00000070190.11	0.0151304	1.71966	/	/	/	/	/	/
27299	ENSG00000134028.13	0.00283515	1.94908	/	/	0.0323324	2.15668	/	/
27334	ENSG00000078589.11	0.0407141	1.55957	0.0215238	4.09723	0.000182124	4.12638	/	/
282809	ENSG00000139323.12	0.000537422	2.27821	/	/	/	/	/	/
283314	ENSG00000205885.6	0.0147905	1.67028	/	/	/	/	/	/
283587	ENSG00000258867.4	0.000108068	2.33296	/	/	/	/	/	/
284702	ENSG00000188206.6	0.0368169	1.62857	/	/	/	/	/	/
2853	ENSG00000120436.3	0.0231869	1.63608	/	/	/	/	/	/
285753	ENSG00000183137.13	0.0143767	1.74977	/	/	/	/	/	/
285966	ENSG00000170379.18	0.00423645	1.91134	/	/	/	/	/	/
285972	ENSG00000242258.1	0.0147189	1.69288	0.0441529	3.15443	/	/	/	/
286442	ENSG00000235304.1	0.0100055	1.75111	/	/	/	/	/	/
286499	ENSG00000179083.6	0.0141674	1.75349	/	/	/	/	/	/
286827	ENSG00000213186.6	0.026365	1.62032	/	/	/	/	/	/
29121	ENSG00000069493.13	0.00197036	2.05174	/	/	0.00146653	3.33892	/	/
29887	ENSG00000086300.14	0.0296539	1.61349	/	/	/	/	/	/
29909	ENSG00000174946.6	8.38426e-05	2.38375	/	/	0.00111044	3.28023	/	/
29915	ENSG00000111727.10	0.0109792	1.72598	/	/	/	/	/	/
3	ENSG00000256069.6	0.00799247	1.81298	/	/	/	/	/	/
3003	ENSG00000113088.5	0.0129744	1.70744	0.0393193	4.41019	0.00025775	3.95706	0.0486876	2.00604
339874	ENSG00000250608.1	4.13354e-05	2.64656	/	/	/	/	/	/
340481	ENSG00000175893.10	0.0316076	1.59083	/	/	0.0380407	2.12015	/	/
3458	ENSG00000111537.4	0.0009307	2.13017	/	/	0.00823851	2.70972	/	/
348645	ENSG00000188511.11	0.00135013	2.05538	/	/	/	/	/	/
353345	ENSG00000187037.7	0.0114844	1.7542	/	/	/	/	/	/
3559	ENSG00000134460.14	0.00419176	1.88143	/	/	/	/	0.0236166	2.43133
356	ENSG00000117560.7	0.00448789	1.87279	/	/	0.0183201	2.30646	/	/
3574	ENSG00000104432.11	0.0111298	1.74223	0.0395364	3.62198	/	/	/	/
3592	ENSG00000168811.5	0.00334861	1.94619	/	/	/	/	/	/
3600	ENSG00000164136.15	3.07429e-05	2.45731	/	/	/	/	/	/
3604	ENSG00000049249.7	0.00915627	1.78762	0.0296519	3.89853	/	/	0.0289975	2.18677
3620	ENSG00000131203.11	0.0273522	1.61981	/	/	0.0295874	2.13806	/	/
3627	ENSG00000169245.5	5.02632e-05	2.49988	/	/	0.0141253	2.32686	/	/
3656	ENSG00000134070.4	0.00261698	1.96896	/	/	/	/	0.00688523	2.658
3659	ENSG00000125347.12	0.000570498	2.20825	/	/	0.00220948	3.1171	/	/
375248	ENSG00000135976.15	0.0128742	1.75774	/	/	/	/	/	/
3783	ENSG00000104783.10	0.0146283	1.72381	/	/	/	/	/	/
378805	ENSG00000231721.5	0.00234535	2.00687	/	/	/	/	/	/
3822	ENSG00000205809.8	0.000189429	2.34268	/	/	/	/	/	/
3823	ENSG00000205810.7	0.0165173	1.67083	/	/	0.0419811	2.15772	/	/
3824	ENSG00000134539.15	0.000506298	2.15986	/	/	/	/	/	/
387119	ENSG00000111860.12	0.00675415	1.94537	0.0268886	2.89453	/	/	/	/
387357	ENSG00000172673.9	0.00405669	1.85986	/	/	0.00104371	3.35637	/	/
387751	ENSG00000254838.5	0.0147513	1.72356	/	/	/	/	/	/
3937	ENSG00000043462.10	0.0190014	1.7233	/	/	/	/	/	/
399	ENSG00000168421.11	0.0187497	1.67133	0.0357396	4.5503	/	/	/	/
400759	ENSG00000225492.5	0.000931477	2.15344	/	/	0.0362745	2.1509	0.0378497	2.29182
401024	ENSG00000188738.12	0.0095559	1.86489	/	/	/	/	/	/
401124	ENSG00000197057.7	0.00197053	1.98199	/	/	0.00320636	2.90342	/	/
4065	ENSG00000054219.10	0.00652953	1.80316	/	/	/	/	/	/
4068	ENSG00000183918.13	0.0147437	1.68774	0.0318649	4.62975	0.00895403	2.53835	/	/
4261	ENSG00000179583.16	0.0124984	1.75878	0.00552238	10.4852	0.00736629	2.71319	0.0205068	2.31547
4283	ENSG00000138755.5	0.0167893	1.70486	/	/	0.00913914	2.52032	/	/
4332	ENSG00000163563.7	0.015554	1.69448	/	/	0.0115628	2.55892	/	/
440823	ENSG00000225783.5	0.00174951	2.03285	0.00212128	5.96652	/	/	/	/
441168	ENSG00000188820.11	0.0123124	1.73728	/	/	/	/	/	/
444882	ENSG00000204869.7	0.030794	1.6538	/	/	/	/	/	/
4671	ENSG00000249437.6	0.0108857	1.73845	/	/	/	/	0.0197599	2.57918
4925	ENSG00000070081.14	0.000543469	2.26127	/	/	/	/	/	/
493860	ENSG00000186714.11	0.0311684	1.57366	/	/	/	/	/	/
50624	ENSG00000138161.11	0.00720565	1.82708	/	/	/	/	/	/
50852	ENSG00000163519.12	0.00584507	1.81165	/	/	0.00491605	2.68674	/	/
51311	ENSG00000101916.11	0.0231114	1.62968	/	/	/	/	0.00515181	2.9139
51314	ENSG00000086288.10	0.000139731	2.27096	/	/	0.0283849	2.1903	/	/
51315	ENSG00000172086.7	0.00142587	2.04792	/	/	/	/	/	/
5146	ENSG00000095464.9	0.0114705	1.7757	/	/	/	/	/	/
5294	ENSG00000105851.9	0.022804	1.6674	0.0362508	3.33778	/	/	/	/
5341	ENSG00000115956.9	0.00234728	1.95716	/	/	/	/	0.0294307	2.37975
53829	ENSG00000181631.6	0.00152195	1.94452	/	/	/	/	/	/
54103	ENSG00000186088.14	0.00913134	1.82038	/	/	/	/	/	/
54464	ENSG00000114127.9	5.38459e-05	2.6849	/	/	/	/	/	/
54482	ENSG00000122435.8	0.0240903	1.67761	/	/	/	/	/	/
54625	ENSG00000173193.12	0.00128402	2.05492	/	/	/	/	/	/
54739	ENSG00000132530.15	0.00811122	1.87298	0.0458886	3.39684	0.0285659	2.24643	/	/
54762	ENSG00000178075.18	0.0056591	1.85818	/	/	/	/	/	/
54809	ENSG00000205413.6	0.00625556	1.86814	/	/	/	/	/	/
54900	ENSG00000122188.11	0.00305227	1.87092	0.0171139	4.16466	/	/	/	/
55013	ENSG00000005059.14	0.0286342	1.58796	/	/	/	/	0.0408874	2.18472
55016	ENSG00000145416.12	0.00314336	1.93711	0.0499263	2.90149	/	/	0.0343292	2.31776
55088	ENSG00000165813.15	0.0103264	1.807	/	/	/	/	/	/
55340	ENSG00000196329.9	0.00121877	2.02536	0.0130388	3.78187	/	/	0.0308391	2.13855
5552	ENSG00000122862.4	0.000645174	2.15298	/	/	/	/	0.0220686	2.40102
55592	ENSG00000238105.6	0.0120108	1.78773	/	/	/	/	/	/
55601	ENSG00000137628.15	3.91953e-05	2.63964	/	/	/	/	/	/
55840	ENSG00000145088.7	0.00469966	1.86882	/	/	/	/	/	/
56253	ENSG00000109943.7	0.00254724	1.94159	/	/	0.00490733	2.76039	/	/
567	ENSG00000166710.16	0.000375935	2.31805	/	/	0.00127593	3.14891	/	/
57091	ENSG00000087589.15	0.0120248	1.73243	/	/	/	/	/	/
57162	ENSG00000197329.10	0.0194254	1.67067	/	/	/	/	/	/
5732	ENSG00000125384.6	0.00969271	1.75554	0.0308506	3.82212	/	/	/	/
5734	ENSG00000171522.5	0.00931683	1.7613	/	/	0.0191865	2.31582	/	/
57471	ENSG00000136541.13	0.00176808	2.04235	/	/	/	/	/	/
57489	ENSG00000122417.14	0.00287632	1.976	/	/	/	/	/	/
57559	ENSG00000138134.10	0.039954	1.60164	/	/	/	/	/	/
57560	ENSG00000068885.13	0.00163754	2.18074	/	/	/	/	/	/
57730	ENSG00000196912.11	0.0454843	1.58115	/	/	/	/	/	/
57733	ENSG00000249948.5	0.0293279	1.71233	/	/	/	/	/	/
5778	ENSG00000143851.14	0.0203878	1.69692	/	/	/	/	0.0270044	2.14869
57823	ENSG00000026751.15	0.0183356	1.70984	/	/	0.0194556	2.30215	0.0100486	2.64751
57826	ENSG00000123728.8	0.00811489	1.78336	/	/	/	/	/	/
5788	ENSG00000081237.17	0.0101419	1.75756	0.00288429	5.60975	/	/	0.036019	2.10416
5791	ENSG00000132334.15	0.0190145	1.64978	0.00993735	4.59438	/	/	/	/
5918	ENSG00000118849.8	0.0168475	1.70798	/	/	/	/	0.0036607	2.87722
5922	ENSG00000155903.10	0.000544929	2.20086	/	/	/	/	/	/
619207	ENSG00000214279.11	0.0435167	1.61029	/	/	/	/	/	/
6304	ENSG00000182568.15	7.99852e-05	2.42023	0.0129257	5.56614	/	/	/	/
6373	ENSG00000169248.11	0.00204271	2.00485	/	/	/	/	/	/
63901	ENSG00000166801.14	0.0403527	1.64452	/	/	/	/	/	/
64092	ENSG00000155307.16	0.00384745	1.90388	/	/	0.0270503	2.21542	/	/
64135	ENSG00000115267.5	6.46175e-05	2.55734	/	/	/	/	/	/
642517	ENSG00000204172.10	0.0237224	1.68354	/	/	/	/	/	/
64332	ENSG00000144802.10	0.00732438	1.94332	/	/	/	/	/	/
64407	ENSG00000150681.8	0.000430272	2.21056	/	/	/	/	/	/
64581	ENSG00000172243.16	0.000888639	2.05389	/	/	0.0132139	2.53941	/	/
647121	ENSG00000231752.4	0.00122252	1.99949	/	/	/	/	/	/
64761	ENSG00000059378.11	4.50839e-05	2.50027	/	/	/	/	/	/
6498	ENSG00000136603.12	0.00837713	1.83038	/	/	/	/	/	/
6503	ENSG00000155926.12	0.00787743	1.7862	/	/	/	/	/	/
651302	ENSG00000226314.6	0.00868282	1.84464	/	/	/	/	/	/
6546	ENSG00000183023.17	0.0295165	1.63137	/	/	0.0448033	2.21632	/	/
6772	ENSG00000115415.17	0.00388899	1.93588	/	/	0.0217999	2.27099	/	/
6775	ENSG00000138378.16	0.00583861	1.81462	/	/	0.0028269	3.04723	/	/
6843	ENSG00000139190.15	0.00658059	1.87004	/	/	/	/	/	/
6846	ENSG00000143185.3	0.0236131	1.62321	/	/	/	/	/	/
693155	ENSG00000207650.1	0.0179379	1.7562	/	/	/	/	/	/
6990	ENSG00000165169.9	0.0357536	1.60025	/	/	/	/	/	/
7097	ENSG00000137462.6	6.16537e-05	2.44498	/	/	/	/	0.0291408	2.35913
7098	ENSG00000164342.11	0.00254842	1.94329	/	/	0.0112778	2.40776	/	/
729092	ENSG00000172650.11	0.00767419	1.87707	/	/	/	/	/	/
729230	ENSG00000121807.5	0.00278729	1.93361	/	/	/	/	/	/
7456	ENSG00000115935.15	0.00254603	2.06518	/	/	/	/	/	/
7634	ENSG00000174255.6	5.07346e-05	2.45581	/	/	/	/	/	/
7903	ENSG00000113532.11	0.000714803	2.19045	0.000312165	16.5408	/	/	/	/
79056	ENSG00000135378.3	0.00834685	1.87472	/	/	/	/	/	/
79694	ENSG00000172469.13	0.00237292	2.01804	/	/	/	/	/	/
79846	ENSG00000105792.18	0.0445089	1.58505	/	/	/	/	/	/
79895	ENSG00000104043.13	0.000355614	2.17143	0.0467859	3.44772	/	/	/	/
79931	ENSG00000050730.14	0.0174492	1.69799	/	/	0.0384512	2.14352	/	/
80184	ENSG00000198707.13	0.00826144	1.85559	/	/	/	/	/	/
80231	ENSG00000120280.5	0.00243112	1.95281	0.00755831	4.64977	/	/	/	/
80321	ENSG00000114107.7	0.00114098	2.10842	/	/	/	/	/	/
80342	ENSG00000009790.13	0.0175877	1.66642	/	/	0.00300255	3.02996	0.021672	2.27735
80830	ENSG00000221963.5	0.000717354	2.15151	/	/	/	/	/	/
80833	ENSG00000128284.18	0.00413449	1.88628	/	/	0.00607268	2.70892	/	/
8302	ENSG00000183542.5	0.00678837	1.87445	/	/	/	/	/	/
8323	ENSG00000164930.10	0.000564947	2.21945	/	/	/	/	/	/
83452	ENSG00000172007.5	0.00248421	2.0101	/	/	/	/	/	/
83666	ENSG00000138496.15	0.000385282	2.29081	/	/	0.0207501	2.24259	0.0397798	2.20554
838	ENSG00000137757.9	0.00627768	1.8331	/	/	/	/	0.0254941	2.53339
84460	ENSG00000166432.13	0.0162938	1.76417	0.0229669	3.5398	/	/	/	/
84636	ENSG00000147138.1	0.0213988	1.6538	/	/	/	/	/	/
84679	ENSG00000065923.8	0.0468161	1.53843	/	/	/	/	/	/
84695	ENSG00000115318.10	0.0258928	1.65044	/	/	/	/	/	/
8477	ENSG00000140030.5	0.00453226	1.88884	/	/	/	/	/	/
84910	ENSG00000153214.8	0.00245717	1.99855	/	/	/	/	/	/
8528	ENSG00000203797.8	0.0117159	1.77404	/	/	/	/	/	/
8631	ENSG00000141293.14	0.0293357	1.61594	0.00250695	12.0019	/	/	/	/
8743	ENSG00000121858.9	0.0111948	1.75775	/	/	/	/	/	/
8790	ENSG00000254685.5	0.0228551	1.73342	/	/	/	/	/	/
8807	ENSG00000115607.8	0.00067818	2.14779	/	/	/	/	/	/
8809	ENSG00000115604.9	0.0400349	1.58016	/	/	0.0378922	2.11884	/	/
8820	ENSG00000163666.7	0.000169752	2.4108	/	/	/	/	/	/
8910	ENSG00000127990.14	0.0068179	1.86203	/	/	/	/	/	/
9103	ENSG00000143226.12	0.00127141	2.1339	/	/	/	/	/	/
9111	ENSG00000123609.9	3.04455e-07	3.25425	0.0109022	4.73202	/	/	/	/
912	ENSG00000158473.6	0.0006773	2.17341	/	/	/	/	0.0405347	2.03531
914	ENSG00000116824.4	0.024	1.64873	0.0245695	4.91203	0.0160209	2.4358	0.0117914	2.51653
91543	ENSG00000134321.10	0.001507	2.11201	/	/	/	/	/	/
917	ENSG00000160654.8	0.0277961	1.60126	/	/	0.0239686	2.23444	/	/
9263	ENSG00000164543.5	0.00536477	1.91804	/	/	/	/	/	/
93349	ENSG00000185404.15	0.00105625	2.06516	/	/	/	/	/	/
941	ENSG00000121594.10	0.00248149	1.9654	/	/	/	/	0.0103686	2.82087
94240	ENSG00000133106.13	0.000819901	2.13596	/	/	0.012052	2.5157	/	/
9447	ENSG00000163568.12	0.0137738	1.73717	/	/	/	/	/	/
9466	ENSG00000104998.3	0.00780737	1.7677	0.0223379	4.17567	/	/	/	/
9495	ENSG00000179841.8	0.000318314	2.18941	/	/	/	/	/	/
952	ENSG00000004468.11	0.00470766	1.87719	/	/	/	/	0.008199	2.62393
9603	ENSG00000050344.8	0.0214307	1.64961	/	/	/	/	/	/
969	ENSG00000110848.7	0.043711	1.55888	/	/	0.000242839	3.86537	/	/
9732	ENSG00000128512.18	0.0139255	1.74925	/	/	/	/	/	/
9738	ENSG00000103540.15	0.014013	1.77749	/	/	/	/	/	/
9934	ENSG00000174944.7	0.00799344	1.81405	/	/	3.31961e-05	5.45844	/	/
9938	ENSG00000163219.10	0.0164405	1.69669	/	/	/	/	0.0108917	2.59943
9958	ENSG00000135655.12	0.0148769	1.73138	/	/	/	/	/	/
9976	ENSG00000110852.4	0.00149199	2.04238	/	/	/	/	/	/
Not Available	ENSG00000259865.1	0.00296534	1.99547	Not Available	Not Available	Not Available	Not Available	Not Available	Not Available
Not Available	ENSG00000272954.1	0.0249142	1.68479	Not Available	Not Available	Not Available	Not Available	Not Available	Not Available
Not Available	ENSG00000274471.1	0.0164292	1.75973	Not Available	Not Available	Not Available	Not Available	Not Available	Not Available
Not Available	ENSG00000225578.1	0.0286526	1.68088	Not Available	Not Available	Not Available	Not Available	Not Available	Not Available
Not Available	ENSG00000231628.1	0.0280499	1.64177	Not Available	Not Available	Not Available	Not Available	Not Available	Not Available
Not Available	ENSG00000237798.1	0.000492608	2.27892	Not Available	Not Available	Not Available	Not Available	Not Available	Not Available
Not Available	ENSG00000240535.7	0.000158875	2.26502	Not Available	Not Available	Not Available	Not Available	Not Available	Not Available
Not Available	ENSG00000241678.1	0.00241297	2.03686	Not Available	Not Available	Not Available	Not Available	Not Available	Not Available
Not Available	ENSG00000225205.4	0.00210595	1.97324	Not Available	Not Available	Not Available	Not Available	Not Available	Not Available
Not Available	ENSG00000232931.4	0.00870677	1.83553	Not Available	Not Available	Not Available	Not Available	Not Available	Not Available
Not Available	ENSG00000234290.2	0.000710129	2.155	Not Available	Not Available	Not Available	Not Available	Not Available	Not Available
Not Available	ENSG00000234571.1	0.00333414	1.96915	Not Available	Not Available	Not Available	Not Available	Not Available	Not Available
Not Available	ENSG00000236985.1	0.0144783	1.77267	Not Available	Not Available	Not Available	Not Available	Not Available	Not Available
Not Available	ENSG00000244733.5	0.0246028	1.72783	Not Available	Not Available	Not Available	Not Available	Not Available	Not Available
Not Available	ENSG00000211829.5	0.0147085	1.71213	Not Available	Not Available	Not Available	Not Available	Not Available	Not Available
Not Available	ENSG00000227191.5	0.0245059	1.65475	Not Available	Not Available	Not Available	Not Available	Not Available	Not Available
Not Available	ENSG00000228393.3	0.0453389	1.63468	Not Available	Not Available	Not Available	Not Available	Not Available	Not Available
Not Available	ENSG00000236015.1	0.00410919	1.93151	Not Available	Not Available	Not Available	Not Available	Not Available	Not Available
Not Available	ENSG00000236790.4	0.0336729	1.6011	Not Available	Not Available	Not Available	Not Available	Not Available	Not Available
Not Available	ENSG00000237352.2	0.0125412	1.75948	Not Available	Not Available	Not Available	Not Available	Not Available	Not Available
Not Available	ENSG00000272054.1	0.0333206	1.64048	Not Available	Not Available	Not Available	Not Available	Not Available	Not Available
Not Available	ENSG00000230231.1	0.0421918	1.72047	Not Available	Not Available	Not Available	Not Available	Not Available	Not Available
Not Available	ENSG00000270605.1	0.0071723	1.87342	Not Available	Not Available	Not Available	Not Available	Not Available	Not Available
Not Available	ENSG00000254503.1	0.00041147	2.27543	Not Available	Not Available	Not Available	Not Available	Not Available	Not Available
Not Available	ENSG00000271151.1	0.00577255	1.91461	Not Available	Not Available	Not Available	Not Available	Not Available	Not Available
Not Available	ENSG00000267121.4	0.003663	1.89184	Not Available	Not Available	Not Available	Not Available	Not Available	Not Available
Not Available	ENSG00000212743.2	0.000175888	2.32877	Not Available	Not Available	Not Available	Not Available	Not Available	Not Available
Not Available	ENSG00000235576.1	0.000616014	2.1359	Not Available	Not Available	Not Available	Not Available	Not Available	Not Available
Not Available	ENSG00000263847.1	0.0245717	1.7059	Not Available	Not Available	Not Available	Not Available	Not Available	Not Available
Not Available	ENSG00000278276.1	0.0463493	1.58859	Not Available	Not Available	Not Available	Not Available	Not Available	Not Available
Not Available	ENSG00000224195.1	0.0426729	1.5646	Not Available	Not Available	Not Available	Not Available	Not Available	Not Available
Not Available	ENSG00000224857.1	0.00150719	2.43574	Not Available	Not Available	Not Available	Not Available	Not Available	Not Available
Not Available	ENSG00000225864.1	0.0303645	1.61663	Not Available	Not Available	Not Available	Not Available	Not Available	Not Available
Not Available	ENSG00000258515.1	0.0123896	1.77174	Not Available	Not Available	Not Available	Not Available	Not Available	Not Available
Not Available	ENSG00000233264.2	0.000698039	2.09025	Not Available	Not Available	Not Available	Not Available	Not Available	Not Available
Not Available	ENSG00000234345.2	0.00397653	1.92226	Not Available	Not Available	Not Available	Not Available	Not Available	Not Available
Not Available	ENSG00000271430.1	0.0150503	1.76878	Not Available	Not Available	Not Available	Not Available	Not Available	Not Available
Not Available	ENSG00000267370.1	0.0312862	1.62499	Not Available	Not Available	Not Available	Not Available	Not Available	Not Available
Not Available	ENSG00000279712.1	0.0255147	1.63524	Not Available	Not Available	Not Available	Not Available	Not Available	Not Available
Not Available	ENSG00000248254.1	0.0245997	1.63375	Not Available	Not Available	Not Available	Not Available	Not Available	Not Available
Not Available	ENSG00000271533.1	0.00447512	1.95295	Not Available	Not Available	Not Available	Not Available	Not Available	Not Available
Not Available	ENSG00000248773.1	0.0175989	1.75355	Not Available	Not Available	Not Available	Not Available	Not Available	Not Available
Not Available	ENSG00000249978.1	0.0340683	1.58732	Not Available	Not Available	Not Available	Not Available	Not Available	Not Available
Not Available	ENSG00000262370.4	0.00597379	1.86162	Not Available	Not Available	Not Available	Not Available	Not Available	Not Available
Not Available	ENSG00000213513.3	0.023834	1.6794	Not Available	Not Available	Not Available	Not Available	Not Available	Not Available
Not Available	ENSG00000223947.1	0.0272297	1.69483	Not Available	Not Available	Not Available	Not Available	Not Available	Not Available
Not Available	ENSG00000224220.1	0.00234066	1.98669	Not Available	Not Available	Not Available	Not Available	Not Available	Not Available
Not Available	ENSG00000271009.2	0.0172607	1.75392	Not Available	Not Available	Not Available	Not Available	Not Available	Not Available
Not Available	ENSG00000266347.2	0.000248577	2.34384	Not Available	Not Available	Not Available	Not Available	Not Available	Not Available
Not Available	ENSG00000253092.1	0.00148899	2.14443	Not Available	Not Available	Not Available	Not Available	Not Available	Not Available
Not Available	ENSG00000233306.2	0.00019812	2.27389	Not Available	Not Available	Not Available	Not Available	Not Available	Not Available
Not Available	ENSG00000248256.1	0.0243786	1.66008	Not Available	Not Available	Not Available	Not Available	Not Available	Not Available
Not Available	ENSG00000200769.1	0.0397279	1.63089	Not Available	Not Available	Not Available	Not Available	Not Available	Not Available
Not Available	ENSG00000258128.2	0.0336949	1.58583	Not Available	Not Available	Not Available	Not Available	Not Available	Not Available
Not Available	ENSG00000259298.1	0.0306378	1.64904	Not Available	Not Available	Not Available	Not Available	Not Available	Not Available
Not Available	ENSG00000260145.1	0.0205908	1.70861	Not Available	Not Available	Not Available	Not Available	Not Available	Not Available
Not Available	ENSG00000261326.2	0.0199293	1.7056	Not Available	Not Available	Not Available	Not Available	Not Available	Not Available
Not Available	ENSG00000225079.2	0.00101377	2.11529	Not Available	Not Available	Not Available	Not Available	Not Available	Not Available
Not Available	ENSG00000255322.1	0.0483347	1.5552	Not Available	Not Available	Not Available	Not Available	Not Available	Not Available
Not Available	ENSG00000259321.1	0.00164346	2.16034	Not Available	Not Available	Not Available	Not Available	Not Available	Not Available
Not Available	ENSG00000225871.2	7.62683e-06	2.71869	Not Available	Not Available	Not Available	Not Available	Not Available	Not Available
Not Available	ENSG00000226004.1	0.000994181	2.0592	Not Available	Not Available	Not Available	Not Available	Not Available	Not Available
Not Available	ENSG00000226751.2	0.00207249	1.97599	Not Available	Not Available	Not Available	Not Available	Not Available	Not Available
Not Available	ENSG00000267344.1	0.0113995	1.79924	Not Available	Not Available	Not Available	Not Available	Not Available	Not Available
Not Available	ENSG00000267369.1	0.0105856	1.82602	Not Available	Not Available	Not Available	Not Available	Not Available	Not Available
Not Available	ENSG00000268027.4	0.000722695	2.09307	Not Available	Not Available	Not Available	Not Available	Not Available	Not Available
Not Available	ENSG00000270426.1	0.00185797	2.01156	Not Available	Not Available	Not Available	Not Available	Not Available	Not Available
Not Available	ENSG00000271327.1	0.00315819	2.00592	Not Available	Not Available	Not Available	Not Available	Not Available	Not Available
Not Available	ENSG00000262312.2	0.0188822	1.69009	Not Available	Not Available	Not Available	Not Available	Not Available	Not Available
Not Available	ENSG00000272491.1	0.0147706	1.77536	Not Available	Not Available	Not Available	Not Available	Not Available	Not Available
Not Available	ENSG00000257524.4	0.0165391	1.6827	Not Available	Not Available	Not Available	Not Available	Not Available	Not Available
Not Available	ENSG00000272567.1	0.0461967	1.59671	Not Available	Not Available	Not Available	Not Available	Not Available	Not Available
Not Available	ENSG00000277978.1	0.0252923	1.70272	Not Available	Not Available	Not Available	Not Available	Not Available	Not Available
Not Available	ENSG00000237484.5	0.000343439	2.15005	Not Available	Not Available	Not Available	Not Available	Not Available	Not Available
Not Available	ENSG00000237781.3	0.0351252	1.6182	Not Available	Not Available	Not Available	Not Available	Not Available	Not Available
Not Available	ENSG00000279048.1	0.024365	1.6757	Not Available	Not Available	Not Available	Not Available	Not Available	Not Available
Not Available	ENSG00000240399.1	0.0172489	1.75901	Not Available	Not Available	Not Available	Not Available	Not Available	Not Available
Not Available	ENSG00000258521.1	0.0170472	1.7623	Not Available	Not Available	Not Available	Not Available	Not Available	Not Available
Not Available	ENSG00000280067.1	0.0417334	1.62819	Not Available	Not Available	Not Available	Not Available	Not Available	Not Available
Not Available	ENSG00000243368.2	0.00274728	1.97741	Not Available	Not Available	Not Available	Not Available	Not Available	Not Available
Not Available	ENSG00000243417.1	0.00776726	1.8458	Not Available	Not Available	Not Available	Not Available	Not Available	Not Available
Not Available	ENSG00000280399.1	0.0177387	1.79499	Not Available	Not Available	Not Available	Not Available	Not Available	Not Available
Not Available	ENSG00000244119.1	0.000370419	2.29689	Not Available	Not Available	Not Available	Not Available	Not Available	Not Available
Not Available	ENSG00000244701.1	0.0488589	1.54937	Not Available	Not Available	Not Available	Not Available	Not Available	Not Available
Not Available	ENSG00000256262.1	0.00354803	1.96987	Not Available	Not Available	Not Available	Not Available	Not Available	Not Available
Not Available	ENSG00000260884.1	0.000491716	2.31532	Not Available	Not Available	Not Available	Not Available	Not Available	Not Available
Not Available	ENSG00000254676.1	0.0283591	1.67906	Not Available	Not Available	Not Available	Not Available	Not Available	Not Available
Not Available	ENSG00000200737.1	0.00139404	2.04204	Not Available	Not Available	Not Available	Not Available	Not Available	Not Available
Not Available	ENSG00000261433.1	0.0201121	1.6744	Not Available	Not Available	Not Available	Not Available	Not Available	Not Available
Not Available	ENSG00000272760.1	0.0317145	1.65379	Not Available	Not Available	Not Available	Not Available	Not Available	Not Available
Not Available	ENSG00000256128.4	0.0283372	1.63479	Not Available	Not Available	Not Available	Not Available	Not Available	Not Available
Not Available	ENSG00000253838.1	0.0484604	1.64846	Not Available	Not Available	Not Available	Not Available	Not Available	Not Available
Not Available	ENSG00000254433.1	0.0224699	1.74509	Not Available	Not Available	Not Available	Not Available	Not Available	Not Available
Not Available	ENSG00000211689.5	0.000816513	2.07785	Not Available	Not Available	Not Available	Not Available	Not Available	Not Available
Not Available	ENSG00000211695.2	0.041771	1.60114	Not Available	Not Available	Not Available	Not Available	Not Available	Not Available
Not Available	ENSG00000280153.1	0.0162053	1.69959	Not Available	Not Available	Not Available	Not Available	Not Available	Not Available
Not Available	ENSG00000255299.4	0.0138465	1.74664	Not Available	Not Available	Not Available	Not Available	Not Available	Not Available
Not Available	ENSG00000197536.9	0.00127269	2.11063	Not Available	Not Available	Not Available	Not Available	Not Available	Not Available
Not Available	ENSG00000202533.1	0.00263332	1.9565	Not Available	Not Available	Not Available	Not Available	Not Available	Not Available
Not Available	ENSG00000279644.1	0.0116329	1.82135	Not Available	Not Available	Not Available	Not Available	Not Available	Not Available
Not Available	ENSG00000257924.1	0.000254295	2.28156	Not Available	Not Available	Not Available	Not Available	Not Available	Not Available
Not Available	ENSG00000278959.1	0.0168332	1.66764	Not Available	Not Available	Not Available	Not Available	Not Available	Not Available
Not Available	ENSG00000159860.6	0.00251238	1.92717	Not Available	Not Available	Not Available	Not Available	Not Available	Not Available
Not Available	ENSG00000217643.1	0.00656412	1.81102	Not Available	Not Available	Not Available	Not Available	Not Available	Not Available
Not Available	ENSG00000222017.1	0.0143278	1.80011	Not Available	Not Available	Not Available	Not Available	Not Available	Not Available
Not Available	ENSG00000257222.1	0.0315694	1.68385	Not Available	Not Available	Not Available	Not Available	Not Available	Not Available
Not Available	ENSG00000268975.1	0.0333603	1.63152	Not Available	Not Available	Not Available	Not Available	Not Available	Not Available
Not Available	ENSG00000259618.1	0.00963892	1.88835	Not Available	Not Available	Not Available	Not Available	Not Available	Not Available
Not Available	ENSG00000227176.1	0.0250552	1.65512	Not Available	Not Available	Not Available	Not Available	Not Available	Not Available
Not Available	ENSG00000270069.1	0.0273381	1.69721	Not Available	Not Available	Not Available	Not Available	Not Available	Not Available
Not Available	ENSG00000238160.1	0.00850338	1.93062	Not Available	Not Available	Not Available	Not Available	Not Available	Not Available
Not Available	ENSG00000168405.13	0.000446455	2.1887	Not Available	Not Available	Not Available	Not Available	Not Available	Not Available
Not Available	ENSG00000280734.1	0.0497711	1.56781	Not Available	Not Available	Not Available	Not Available	Not Available	Not Available
Not Available	ENSG00000233912.1	0.0373823	1.58315	Not Available	Not Available	Not Available	Not Available	Not Available	Not Available
Not Available	ENSG00000174501.13	0.00242241	1.99746	Not Available	Not Available	Not Available	Not Available	Not Available	Not Available
Not Available	ENSG00000269919.1	0.00444037	1.86838	Not Available	Not Available	Not Available	Not Available	Not Available	Not Available
Not Available	ENSG00000273445.1	0.0114051	1.77641	Not Available	Not Available	Not Available	Not Available	Not Available	Not Available
Not Available	ENSG00000271532.1	0.00311195	2.00407	Not Available	Not Available	Not Available	Not Available	Not Available	Not Available
Not Available	ENSG00000274898.1	0.0121125	1.7684	Not Available	Not Available	Not Available	Not Available	Not Available	Not Available
Not Available	ENSG00000259834.1	8.57463e-06	2.59625	Not Available	Not Available	Not Available	Not Available	Not Available	Not Available
Not Available	ENSG00000267595.1	0.0357039	1.64522	Not Available	Not Available	Not Available	Not Available	Not Available	Not Available
Not Available	ENSG00000243696.4	0.0404913	1.63883	Not Available	Not Available	Not Available	Not Available	Not Available	Not Available
Not Available	ENSG00000244720.1	0.00797746	1.85965	Not Available	Not Available	Not Available	Not Available	Not Available	Not Available
Not Available	ENSG00000245662.2	0.0348447	1.70342	Not Available	Not Available	Not Available	Not Available	Not Available	Not Available
Not Available	ENSG00000231128.4	0.0263529	1.72551	Not Available	Not Available	Not Available	Not Available	Not Available	Not Available
Not Available	ENSG00000279214.1	0.0441318	1.59959	Not Available	Not Available	Not Available	Not Available	Not Available	Not Available
Not Available	ENSG00000231646.4	0.00710241	1.90252	Not Available	Not Available	Not Available	Not Available	Not Available	Not Available
Not Available	ENSG00000201499.1	0.00486025	1.91492	Not Available	Not Available	Not Available	Not Available	Not Available	Not Available
Not Available	ENSG00000256039.1	0.00281202	1.9435	Not Available	Not Available	Not Available	Not Available	Not Available	Not Available
Not Available	ENSG00000233029.3	0.0374808	1.58335	Not Available	Not Available	Not Available	Not Available	Not Available	Not Available
Not Available	ENSG00000229591.1	0.00452324	1.93613	Not Available	Not Available	Not Available	Not Available	Not Available	Not Available
Not Available	ENSG00000265531.2	0.0359822	1.61113	Not Available	Not Available	Not Available	Not Available	Not Available	Not Available
Not Available	ENSG00000258302.2	0.00219822	1.9888	Not Available	Not Available	Not Available	Not Available	Not Available	Not Available
Not Available	ENSG00000273261.1	0.0151428	1.75405	Not Available	Not Available	Not Available	Not Available	Not Available	Not Available
Not Available	ENSG00000237522.1	0.0123175	1.75596	Not Available	Not Available	Not Available	Not Available	Not Available	Not Available
Not Available	ENSG00000271161.1	0.0363621	1.64051	Not Available	Not Available	Not Available	Not Available	Not Available	Not Available
Not Available	ENSG00000254965.1	0.00110102	2.13355	Not Available	Not Available	Not Available	Not Available	Not Available	Not Available
Not Available	ENSG00000259162.1	2.78168e-06	2.78225	Not Available	Not Available	Not Available	Not Available	Not Available	Not Available
Not Available	ENSG00000258927.1	0.0405264	1.57356	Not Available	Not Available	Not Available	Not Available	Not Available	Not Available
Not Available	ENSG00000235308.1	0.0121812	1.79373	Not Available	Not Available	Not Available	Not Available	Not Available	Not Available
Not Available	ENSG00000255987.1	0.00240046	2.12877	Not Available	Not Available	Not Available	Not Available	Not Available	Not Available
Not Available	ENSG00000236184.1	0.0445061	1.57008	Not Available	Not Available	Not Available	Not Available	Not Available	Not Available
Not Available	ENSG00000260711.2	0.00222785	1.92636	Not Available	Not Available	Not Available	Not Available	Not Available	Not Available
Not Available	ENSG00000223745.6	0.00681911	1.90797	Not Available	Not Available	Not Available	Not Available	Not Available	Not Available
Not Available	ENSG00000261114.1	0.0106223	1.8047	Not Available	Not Available	Not Available	Not Available	Not Available	Not Available
Not Available	ENSG00000256967.1	0.0364854	1.58145	Not Available	Not Available	Not Available	Not Available	Not Available	Not Available
Not Available	ENSG00000279229.1	0.00506527	1.90546	Not Available	Not Available	Not Available	Not Available	Not Available	Not Available
Not Available	ENSG00000271857.1	0.0253897	1.62737	Not Available	Not Available	Not Available	Not Available	Not Available	Not Available
Not Available	ENSG00000279758.1	0.0251708	1.68751	Not Available	Not Available	Not Available	Not Available	Not Available	Not Available
Not Available	ENSG00000272341.1	1.6877e-05	2.55135	Not Available	Not Available	Not Available	Not Available	Not Available	Not Available
Not Available	ENSG00000275560.1	0.000751321	2.0874	Not Available	Not Available	Not Available	Not Available	Not Available	Not Available
Not Available	ENSG00000235111.1	7.17758e-05	2.3811	Not Available	Not Available	Not Available	Not Available	Not Available	Not Available
Not Available	ENSG00000277595.1	0.0165654	1.7231	Not Available	Not Available	Not Available	Not Available	Not Available	Not Available
Not Available	ENSG00000273076.1	0.00454641	1.94149	Not Available	Not Available	Not Available	Not Available	Not Available	Not Available
Not Available	ENSG00000257489.5	0.0394423	1.62394	Not Available	Not Available	Not Available	Not Available	Not Available	Not Available
Not Available	ENSG00000270661.1	0.0283827	1.69145	Not Available	Not Available	Not Available	Not Available	Not Available	Not Available
Not Available	ENSG00000236559.1	0.0200222	1.68822	Not Available	Not Available	Not Available	Not Available	Not Available	Not Available
Not Available	ENSG00000277511.1	0.0135411	1.81079	Not Available	Not Available	Not Available	Not Available	Not Available	Not Available
Not Available	ENSG00000227531.1	0.0105611	1.82992	Not Available	Not Available	Not Available	Not Available	Not Available	Not Available
Not Available	ENSG00000228168.1	0.0294167	1.61887	Not Available	Not Available	Not Available	Not Available	Not Available	Not Available
Not Available	ENSG00000280992.1	0.005058	1.90772	Not Available	Not Available	Not Available	Not Available	Not Available	Not Available
Not Available	ENSG00000267554.1	0.000920847	2.07545	Not Available	Not Available	Not Available	Not Available	Not Available	Not Available
Not Available	ENSG00000279965.1	0.0374509	1.63848	Not Available	Not Available	Not Available	Not Available	Not Available	Not Available
Not Available	ENSG00000280077.1	0.00057619	2.34735	Not Available	Not Available	Not Available	Not Available	Not Available	Not Available
Not Available	ENSG00000270133.1	0.0450502	1.57591	Not Available	Not Available	Not Available	Not Available	Not Available	Not Available
Not Available	ENSG00000279296.1	4.43935e-05	2.56687	Not Available	Not Available	Not Available	Not Available	Not Available	Not Available
Not Available	ENSG00000267074.1	0.00028616	2.21792	Not Available	Not Available	Not Available	Not Available	Not Available	Not Available
Not Available	ENSG00000273356.1	0.0391796	1.58527	Not Available	Not Available	Not Available	Not Available	Not Available	Not Available
Not Available	ENSG00000261136.1	0.0117958	1.82669	Not Available	Not Available	Not Available	Not Available	Not Available	Not Available
Not Available	ENSG00000256427.1	0.010047	1.77974	Not Available	Not Available	Not Available	Not Available	Not Available	Not Available
Not Available	ENSG00000271983.1	0.000989275	2.14857	Not Available	Not Available	Not Available	Not Available	Not Available	Not Available
Not Available	ENSG00000267163.1	0.0012771	2.2052	Not Available	Not Available	Not Available	Not Available	Not Available	Not Available
1Of 467 genes that were significantly associated with OS, there were 172 genes that having no gene expression information in the three GEO data sets. Thus these genes were labelled "Not Available" in this column.
2GENCODE v22 was used for gene annotation, which were extracted directly from TCGA.
3Survival analysis was performed using the Kaplan-Meier method, and differences was evaluated using the Log-rank (Mantel-Cox) test. We retained genes with P value less than 0.05.
4The three GEO data sets were used for validation. Slant line represented there was no significant (P > 0.05) observation. "Not Available" represented there was not gene expression information in the corresponding data set.
